# Supplementary material
Source: PubMed Central journal article supplement (PMC4560998)
Supplement: NIHMS703716-supplement-1.pdf [file NIHMS703716-supplement-1.pdf]

**Elucidation of novel 13-series resolvins that increase with atorvastatin and clear  
infections**

Jesmond Dalli<sup>1</sup>, Nan Chiang<sup>1</sup> and Charles N. Serhan<sup>1</sup>

<sup>1</sup>Center for Experimental Therapeutics and Reperfusion Injury, Department of  
Anesthesiology, Preoperative and Pain Medicine,  
Harvard Institutes of Medicine, Brigham and Women's Hospital  
and Harvard Medical School, Boston, Massachusetts.

Correspondence should be addressed to: Prof. Charles N Serhan,

E-mail: [cnserhan@zeus.bwh.harvard.edu](mailto:cnserhan@zeus.bwh.harvard.edu); Tel: 617-525-5001; Fax: 617-525-5017

1 **Supplementary Figures**

2 **Supplementary Figure 1: Neutrophil-endothelial cell products do not display direct**

3 **antibacterial actions.** (a) Fractions were extracted from human (h) neutrophil (PMN)-  
4 endothelial cell (EC) co-incubations (see methods). These products or ampicillin (1mM)  
5 were placed on GF-C filters then on LB agar plates containing *E. coli* ( $1 \times 10^7$  CFU). The  
6 zone of clearance was assessed after overnight incubation at 37°C. Results are  
7 representative of three independent experiments. (b) Proposed structures and  
8 biosynthetic scheme for 13-series resolvins (RvT)

9

10

11 **Supplementary Figure 2: Identification of novel n-3 docosapentaenoic acid**

12 **derived 13-series resolvins in neutrophil endothelial co-incubations.** (a-d) Fractions

13 were extracted from human neutrophil (hPMN)-endothelial cell (hEC) co-incubations  
14 (see methods). Mediators were profiled using lipid mediator (LM) metabololipidomics.

15 MS-MS fragmentation spectra employed for identification of (a) 13-series resolvin (RvT)

16 1, (b) RvT2, (c) RvT3 and (d) RvT4. Results are representative of n=4 independent cell

17 incubations. (e) hEC were incubated with IL-1 $\beta$  and TNF- $\alpha$  (10ng/ml each, 16h, 37°C),

18 then with vehicle (PBS plus 0.01% EtOH), 1 $\mu$ M EPA, n-3 DPA or DHA (15min, 37°C)

19 and human neutrophils (hPMN;  $1 \times 10^7$  cells/ml, 60min, 37°C). Fractions were extracted

20 using solid phase extraction columns, identified and quantified using LC-MS-MS (see

21 methods for details). Results are mean $\pm$ s.e.m. n=3 cell preparations from two

22 independent experiments. \*p<0.05, \*\*p<0.01 vs hPMN-EC incubations. (f) hEC, hPMN

23 and hPMN-EC were incubated with n-3 DPA (see methods for details) and RvT identified

24 and quantified using LC-MS-MS based LM metabololipidomics. RvT1, RvT2, RvT3 and

25 RvT4 levels identified in neutrophil-endothelial cell co-cultures. Results are mean $\pm$ s.e.m.

26 n=4 cell preparations per group from four independent experiments. \*p<0.05 vs.  
27 amounts in hEC.  
28  
29 **Supplementary Figure 3: Human COX-2 converts n-3DPA to 13R-HDPA in**  
30 **endothelial cells.** (a) Human endothelial cells (hEC) were incubated with IL-1 $\beta$  and  
31 TNF- $\alpha$  (10ng/ml each, 16h, 37°C) followed by vehicle (PBS containing 0.01% EtOH) or  
32 n-3 DPA (1 $\mu$ M, 60 min, 37°C). Fractions were extracted (see methods) and 13-HDPA  
33 was profiled using LM metabololipidomics. Results are mean $\pm$ s.e.m. n=4 cell  
34 preparations from four independent experiments. \*p<0.05 vs. hEC plus vehicle cells. (b)  
35 MRM chromatograms for standard 13R-HDPA and 13S-HDPA from chiral LC-MS-MS.  
36 (c,d) hEC were incubated as in (a) and 13-HDPA was assessed by chiral LM  
37 metabololipidomics. (c) MRM chromatogram for ion pair m/z 345>195 (d) MS-MS  
38 spectrum employed in the identification of 13R-HDPA. Results for (c,d) are  
39 representative of n=4 cell preparations from four independent experiments. (e) hEC  
40 were incubated with IL-1 $\beta$  and TNF- $\alpha$  (10ng/ml each, 16h, 37°C) followed by vehicle  
41 (PBS containing 0.01% DMSO) or celecoxib (25 $\mu$ M, 25min, 37°C); n-3 DPA (1 $\mu$ M,  
42 60min, 37°C) was then added, products extracted and 13-HDPA levels determined by  
43 LM metabololipidomics. (f) Endothelial cells were transfected with control scrambled  
44 (CS) or human COX-2 shRNA; cells were then incubated with IL-1 $\beta$  and TNF- $\alpha$  (10ng/ml  
45 each, 16h, 37°C) and n-3 DPA (1 $\mu$ M, 60min, 37°C). 13-HDPA levels were determined by  
46 LM metabololipidomics. Results for (e,f) are mean $\pm$ s.e.m. n=4 cell preparations from four  
47 independent experiments. For (e) \*p<0.05 vs. IL-1 $\beta$  plus TNF- $\alpha$  incubations alone. For (f)  
48 \*p<0.05 vs. CS-shRNA plus IL-1 $\beta$  and TNF- $\alpha$  incubations. (g-h) Human recombinant (hr)  
49 COX-2 was incubated with n-3 DPA or AA (0.1M Tris-HCl, pH8.0, 20 $\mu$ M porcine  
50 hematin, 0.67mM phenol, Room Temperature, 60min) at the indicated concentrations

51 and product formation was assessed (see methods) using (g) chiral LM  
52 metabololipidomics for hrCOX-2 products from n-3 DPA. (h) Michaelis Menten kinetics.  
53 Results for (g) are representative of n=6 incubations; (h) are mean±s.e.m. n=6  
54 incubations from three independent experiments.

55

56 **Supplementary Figure 4: Physical characteristics of RvT1, RvT2, RvT3 and RvT4.**

57 13R-HDPA was incubated with potato 5-LOX (0.1M phosphate buffer, pH 6.3, 0.03%  
58 Tween 20, 30min); products were isolated using RP-UV-HPLC (see methods for details).  
59 (a-d) In phase, online UV-chromophores recorded for (a) RvT1, (b) RvT2, (c) RvT3, (d)  
60 RvT4. (e-h) Isolated products were incubated with diazomethane in ether (30min, Room  
61 Temperature) and assessed by LM metabololipidomics. MS-MS fragmentation spectra  
62 for the sodium adducts of (e) RvT1-methyl ester, (f) RvT2-methyl ester, (g) RvT3-methyl  
63 ester and (h) RvT4-methyl ester. Results are representative of three independent  
64 experiments.

65

66 **Supplementary Figure 5: Molecular oxygen incorporation demonstrates a role for**  
67 **neutrophil lipoxygenases in the biosynthesis of the novel RvT.** Human peripheral

68 blood neutrophils ( $5 \times 10^7$ /ml) were incubated with 13-HPDA (75ng/ml; PBS<sup>+/+</sup>; pH7.45) in  
69 an atmosphere enriched in <sup>18</sup>O<sub>2</sub>. *E. coli* were then added ( $2.5 \times 10^9$ /ml), incubations  
70 quenched after 30min (37°C) using 2 volumes of ice-cold methanol and products  
71 reduced using sodium borohydride (1µg/ml, 15min, 4°C). Products were extracted, and  
72 identified using LC-MS-MS. (a-d) Representative structures and MS-MS spectra  
73 employed in the identification of (a) RvT1, (b) RvT2, (c) RvT3 and (d) RvT4. Results are  
74 representative of 4 neutrophil preparations from four independent experiments.

75

76 **Supplementary Figure 6: Trapping products indicate the formation of an epoxide**  
77 **intermediate in RvT2 and RvT3 biosynthesis.** Human neutrophils ( $5 \times 10^7$  cells/ml)  
78 were incubated with 13R-HDPA ( $1 \mu\text{M}$ ,  $37^\circ\text{C}$ , PBS pH 7.45) and *E. coli* ( $1 \times 10^9$  CFU/ml,  
79 2min,  $37^\circ\text{C}$ ). Incubations were stopped with 2 volumes of acidified methanol (apparent  
80 pH 3), the products extracted and profiled using LM metabololipidomics. (a) MRM  
81 chromatogram for the methoxy-trapping products of RvT2 (left panel) and MS-MS  
82 spectra (right panel). (b) MRM chromatogram for the methoxy-trapping products of RvT3  
83 (left panel) and MS-MS spectra (right panel). Results are representative of three  
84 independent experiments.

85

86 **Supplementary Figure 7: Inhibition of nitric oxide synthase reverts atorvastatin**  
87 **mediated increases in RvT.** (a) Human (h) endothelial cells (EC) were incubated with  
88 IL- $1\beta$  and TNF- $\alpha$  ( $10\text{ng/ml}$  each, 16h,  $37^\circ\text{C}$ ), vehicle (PBS containing 0.01% DMSO), L-  
89 NAME ( $25\mu\text{M}$ ) or 1400W ( $10\mu\text{M}$ , 25min,  $37^\circ\text{C}$ ). Atorvastatin (atorv;  $30\mu\text{M}$ , 30min), n-3  
90 DPA ( $1\mu\text{M}$ , 15min,  $37^\circ\text{C}$ ) and PMN ( $1 \times 10^7$  cells/ml, 60min,  $37^\circ\text{C}$ ) were then added,  
91 fractions were isolated and profiled using LM metabololipidomics. Results are  
92 mean $\pm$ s.e.m. n=4 independent incubations from four independent experiments. \* $p < 0.05$ ,  
93 vs. hPMN-EC incubations. # $p < 0.05$  vs hPMN-EC plus atorvastatin incubations.  
94 (b) Human recombinant COX-2 was incubated without (COX-2) or with S-  
95 nitrosoglutathione (COX-2+GSNO) prepared as detailed in the methods section for  
96 30min (Room Temperature). S-nitrosylation was then assessed using Western blotting  
97 (see methods for details). Results are representative of n= 6 incubations and three  
98 independent experiments.

99

100 **Supplementary Figure 8: RvT regulate inflammasome components in human**  
101 **macrophages and mice during *E.coli* infections.** Macrophages ( $M\Phi$ ;  $1.5 \times 10^5$

102 cells/well) were incubated with the indicated concentrations of RvT1, RvT2 plus RvT3  
103 (1:1 ratio), RvT4 or vehicle (PBS containing 0.01% EtOH; 15min, 37°C, pH 7.45), *E.coli*  
104 were added ( $1.5 \times 10^7$  CFU/well, 16h, 37°C, pH 7.45) and (a) caspase 1 levels assessed  
105 by flow cytometry; (b) IL-1 $\beta$  levels and (c) LDH activity were measured in the  
106 supernatants. Results are expressed as mean $\pm$ s.e.m. n=4 donors from three  
107 independent experiments. \*p<0.05, \*\*p<0.01, \*\*\*<0.001 vs. macrophages plus *E.coli*;  
108 ##p<0.01 vs. macrophages alone. Mice were given vehicle (saline containing 0.1%  
109 EtOH) or a combination of RvT1, RvT2, RvT3 and RvT4 (at a ratio of 2:1:1:8), which  
110 were each isolated and quantified by RP-UV-HPLC (see methods for details) *via i.p.*  
111 injection 2h post *E.coli* ( $1 \times 10^7$  CFU/mouse) inoculation; 12h later (c) exudate  
112 monocyte/macrophage caspase 1 expression, (d) exudate IL-1 $\beta$  levels, (e) exudate  
113 lactate dehydrogenase activity and (f) peripheral blood leukocyte-platelet aggregates  
114 were determined. Results are mean $\pm$  s.e.m. n=5 mice per group from two independent  
115 experiments. \*p<0.05, \*\*p<0.01 vs. *E.coli* mice.

116

117 **Supplementary Figure 9: RvT regulate exudate eicosanoids and do not display**  
118 **antibacterial actions at bioactive concentrations.** (a) RvT were isolated and  
119 quantified using RP-UV-HPLC. RvT1, RvT2 plus RvT3, RvT4 (10 $\mu$ M) or ampicillin  
120 (10mM) were placed on LB agar plates containing *E. coli* ( $1 \times 10^7$  CFU). The zone of  
121 clearance was assessed after overnight incubation at 37°C. Results are representative  
122 of three independent experiments. (b) Mice were given a combination of RvT1, RvT2,  
123 RvT3 and RvT4 (RvT; 125ng each/mouse; *i.p.*); each was isolated and quantified using  
124 RP-UV-HPLC (see methods for details), then combined in a mixture or vehicle (saline  
125 containing 0.1% EtOH) 5 min prior to *E.coli* ( $1 \times 10^7$  CFU/mouse) inoculation; 12h later  
126 peritoneal exudates were collected and LM profiled using LM metabololipidomics.

127 Results are mean±s.e.m. n=4 mice per group from two independent experiments.  
128 \*p<0.05; \*\*p<0.01 vs. *E.coli* mice.  
129  
130 **Supplementary Figure 10: Atorvastatin and RvT reduce local and systemic**  
131 **inflammation in murine infections.** Mice were administered a combination of RvT1,  
132 RvT2, RvT3 and RvT4 (RvT ~12.5ng/mouse each); each was isolated and quantified  
133 using RP-UV-HPLC (see methods for details) and/or atorvastatin (atorv; 0.5µg/mouse  
134 *i.p.*) or vehicle (saline containing 0.1% EtOH) 5 min prior to *E.coli* inoculation ( $1 \times 10^7$   
135 CFU/mouse; *i.p.*). Twelve hours later (a) peritoneal exudate neutrophil counts, (b)  
136 exudate bacterial loads, (c) peripheral blood bacterial loads, (d) exudate IL-1β levels, (e)  
137 exudate lactate dehydrogenase activity, (f) bacterial phagocytosis by peritoneal  
138 leukocytes, and (g) macrophage efferocytosis in peritoneal exudates were measured.  
139 Results are mean±s.e.m. n=4 mice per group, from two independent experiments.  
140 \*p<0.05 , \*\*p<0.01 vs. *E.coli* mice. (h-k) Mice were inoculated with *E.coli* ( $1 \times 10^7$   
141 CFU/mouse; *i.p.*); 2h later administered RvT1, RvT2, RvT3 and RvT4; each was isolated  
142 and quantified using RP-UV-HPLC (see methods for details), then combined in a mixture  
143 at a ratio of 2:1:1:8 (RvT; total 50ng/mouse) and/or atorvastatin (atorv; 0.5µg/mouse *i.p.*)  
144 or vehicle (saline containing 0.1% EtOH). (h) Twelve hours later, peritoneal exudate  
145 neutrophil counts (left panel) and exudate bacterial loads were measured (right panel).  
146 (i-k) Six hours after *E.coli* administration (i,k), peripheral blood eicosanoid levels were  
147 measured using LC-MS-MS or ELISA; (j) Lung mRNA levels of endothelin (ET)-1 and  
148 plasminogen activator inhibitor (PAI) were measured using qRT-PCR. \*p<0.05,  
149 \*\*p<0.01, \*\*\*p<0.001 vs. *E.coli* mice; #p<0.05 vs. *E.coli* plus RvT mice; § p<0.05 vs.  
150 *E.coli* plus atorvastatin mice. Results for a-e are mean±s.e.m. n=5 mice per group from  
151 two independent experiments.

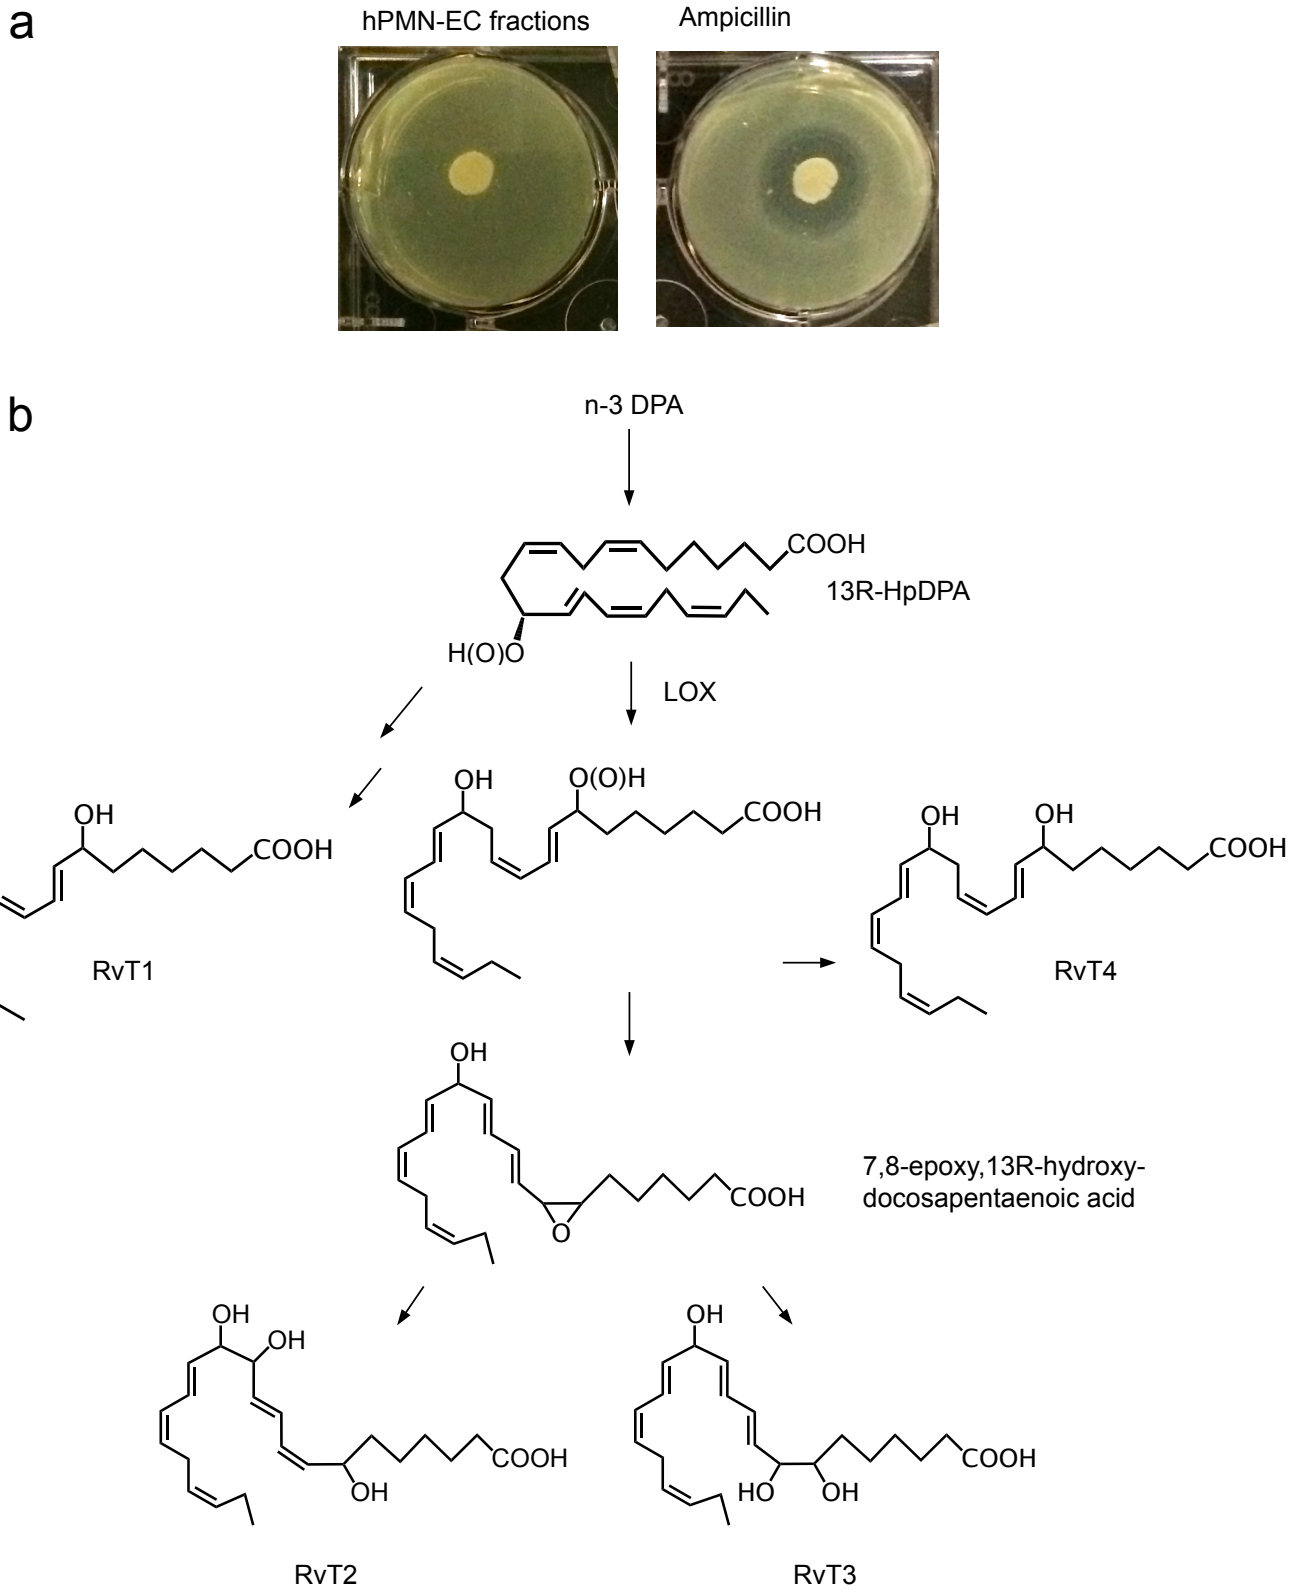



RvT1

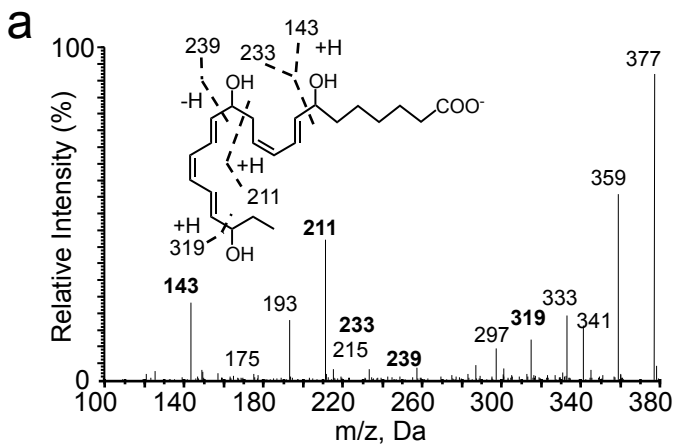

RvT2

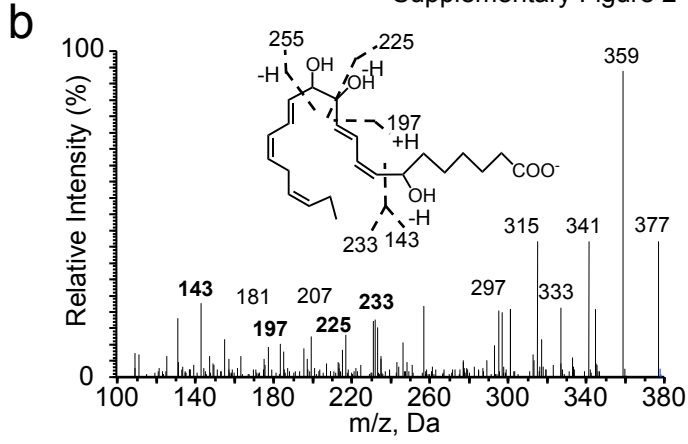

Supplementary Figure 2

RvT3

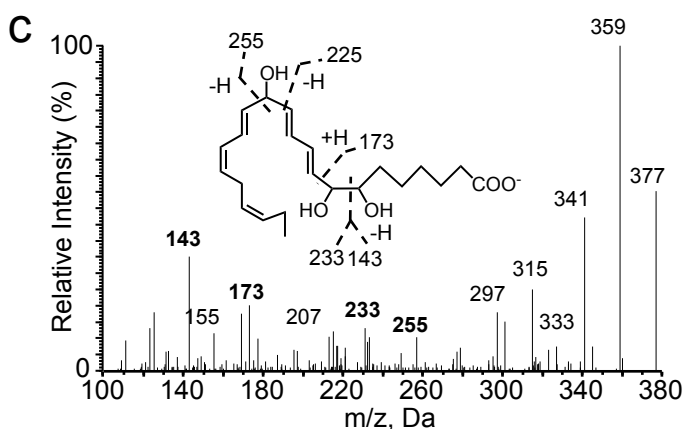

RvT4

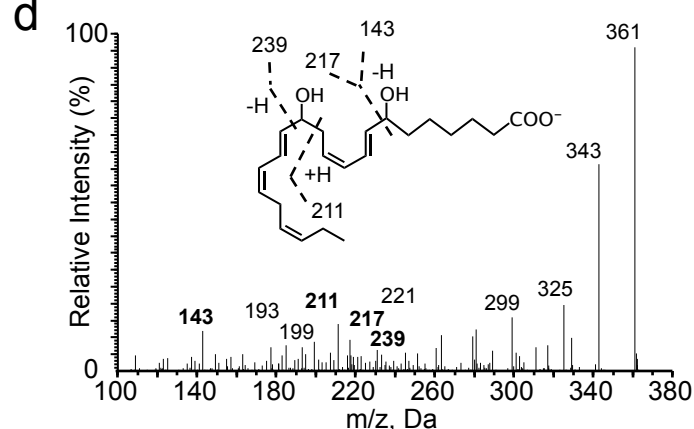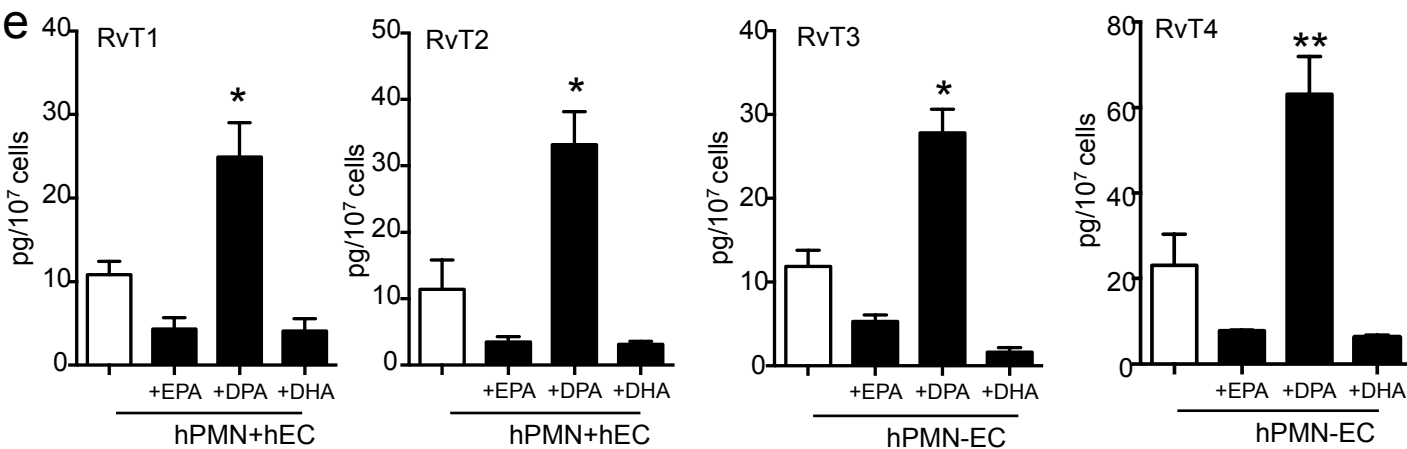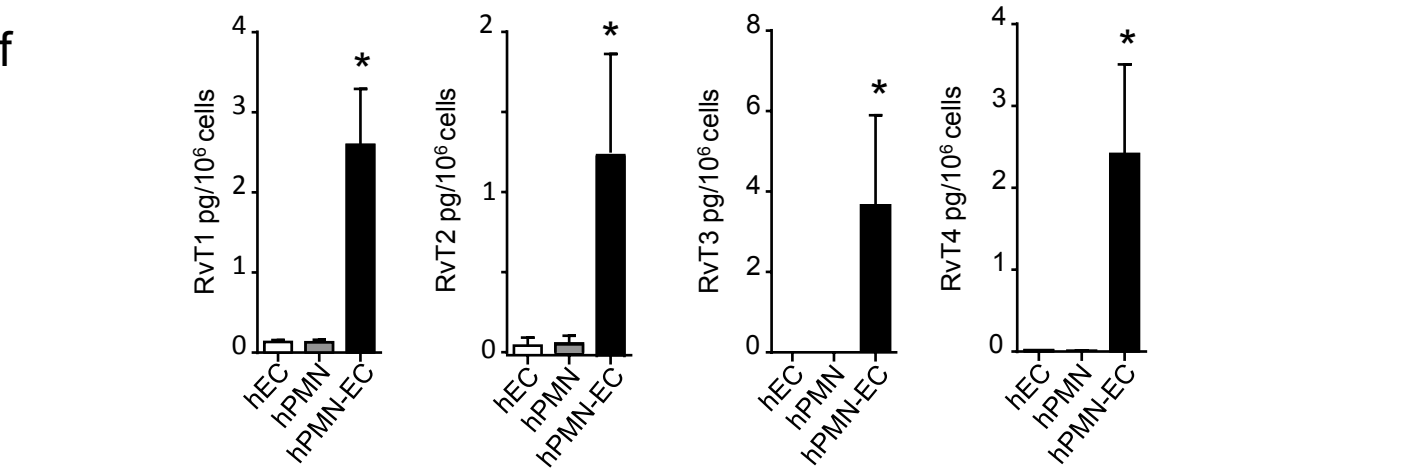

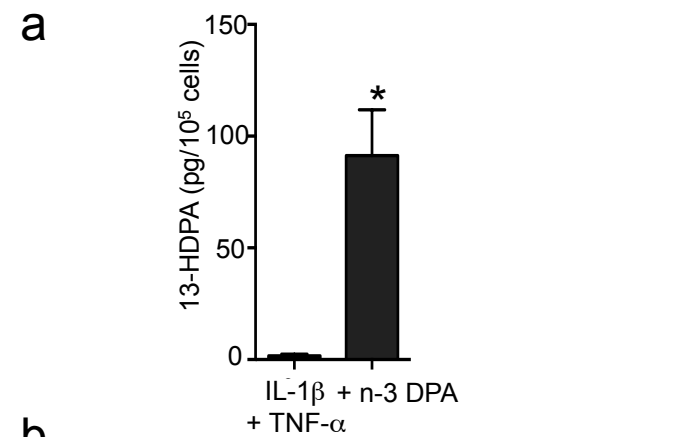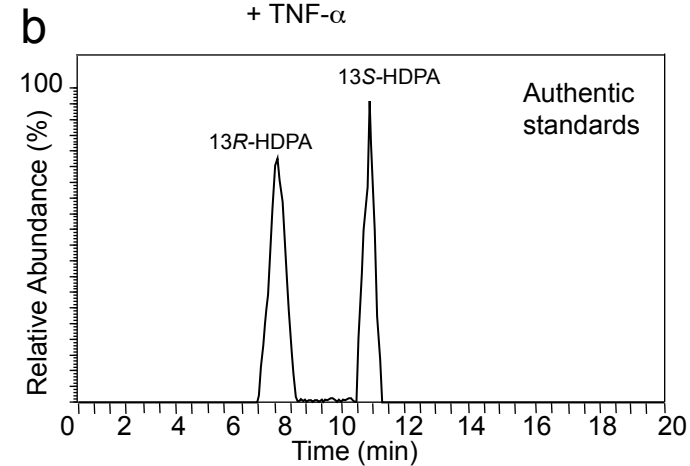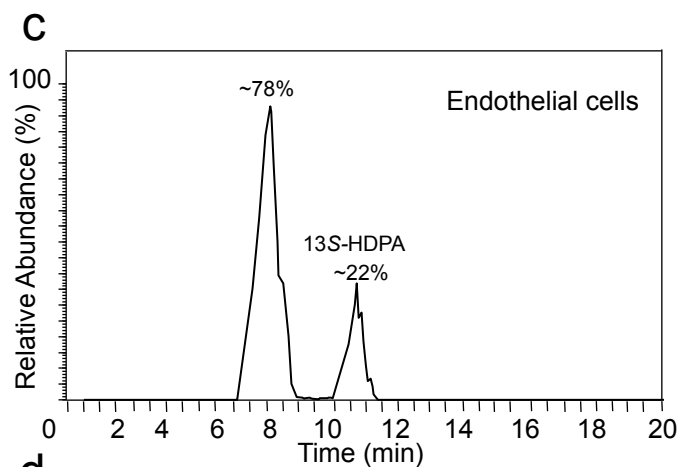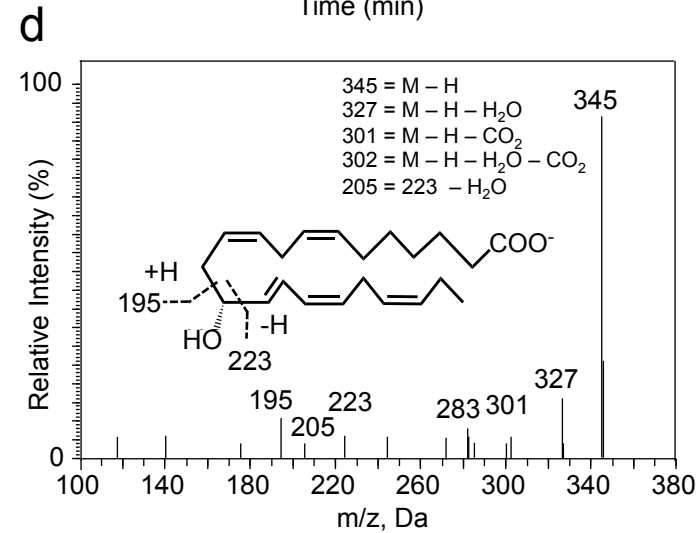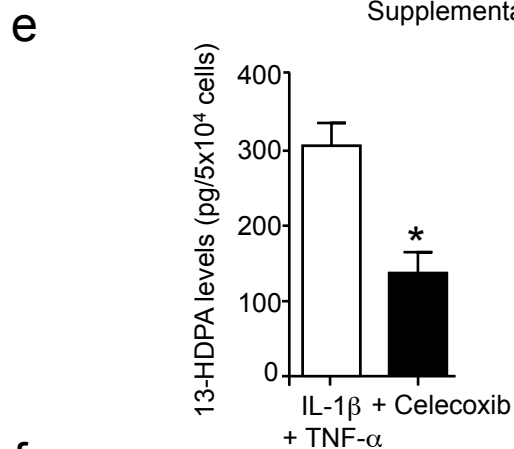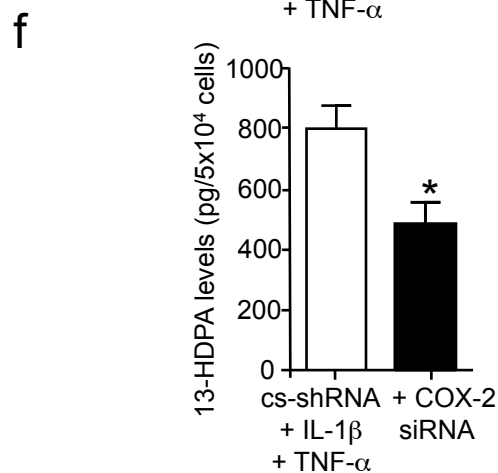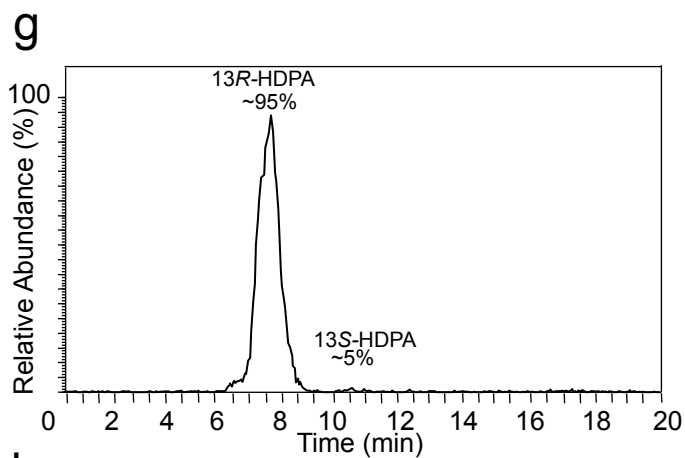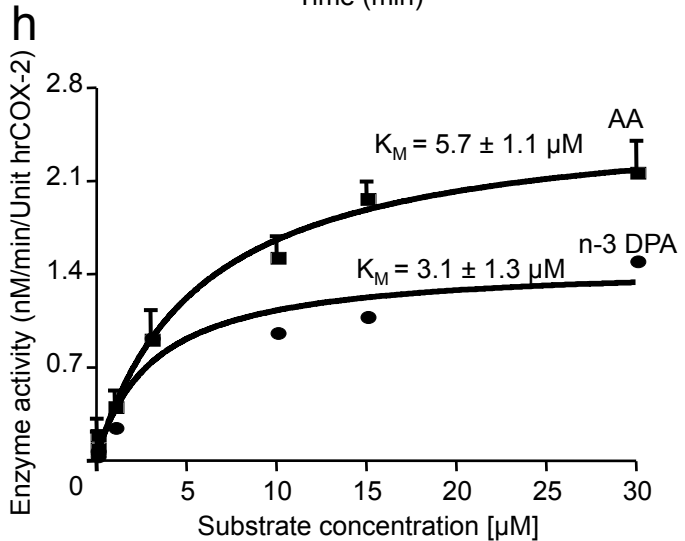

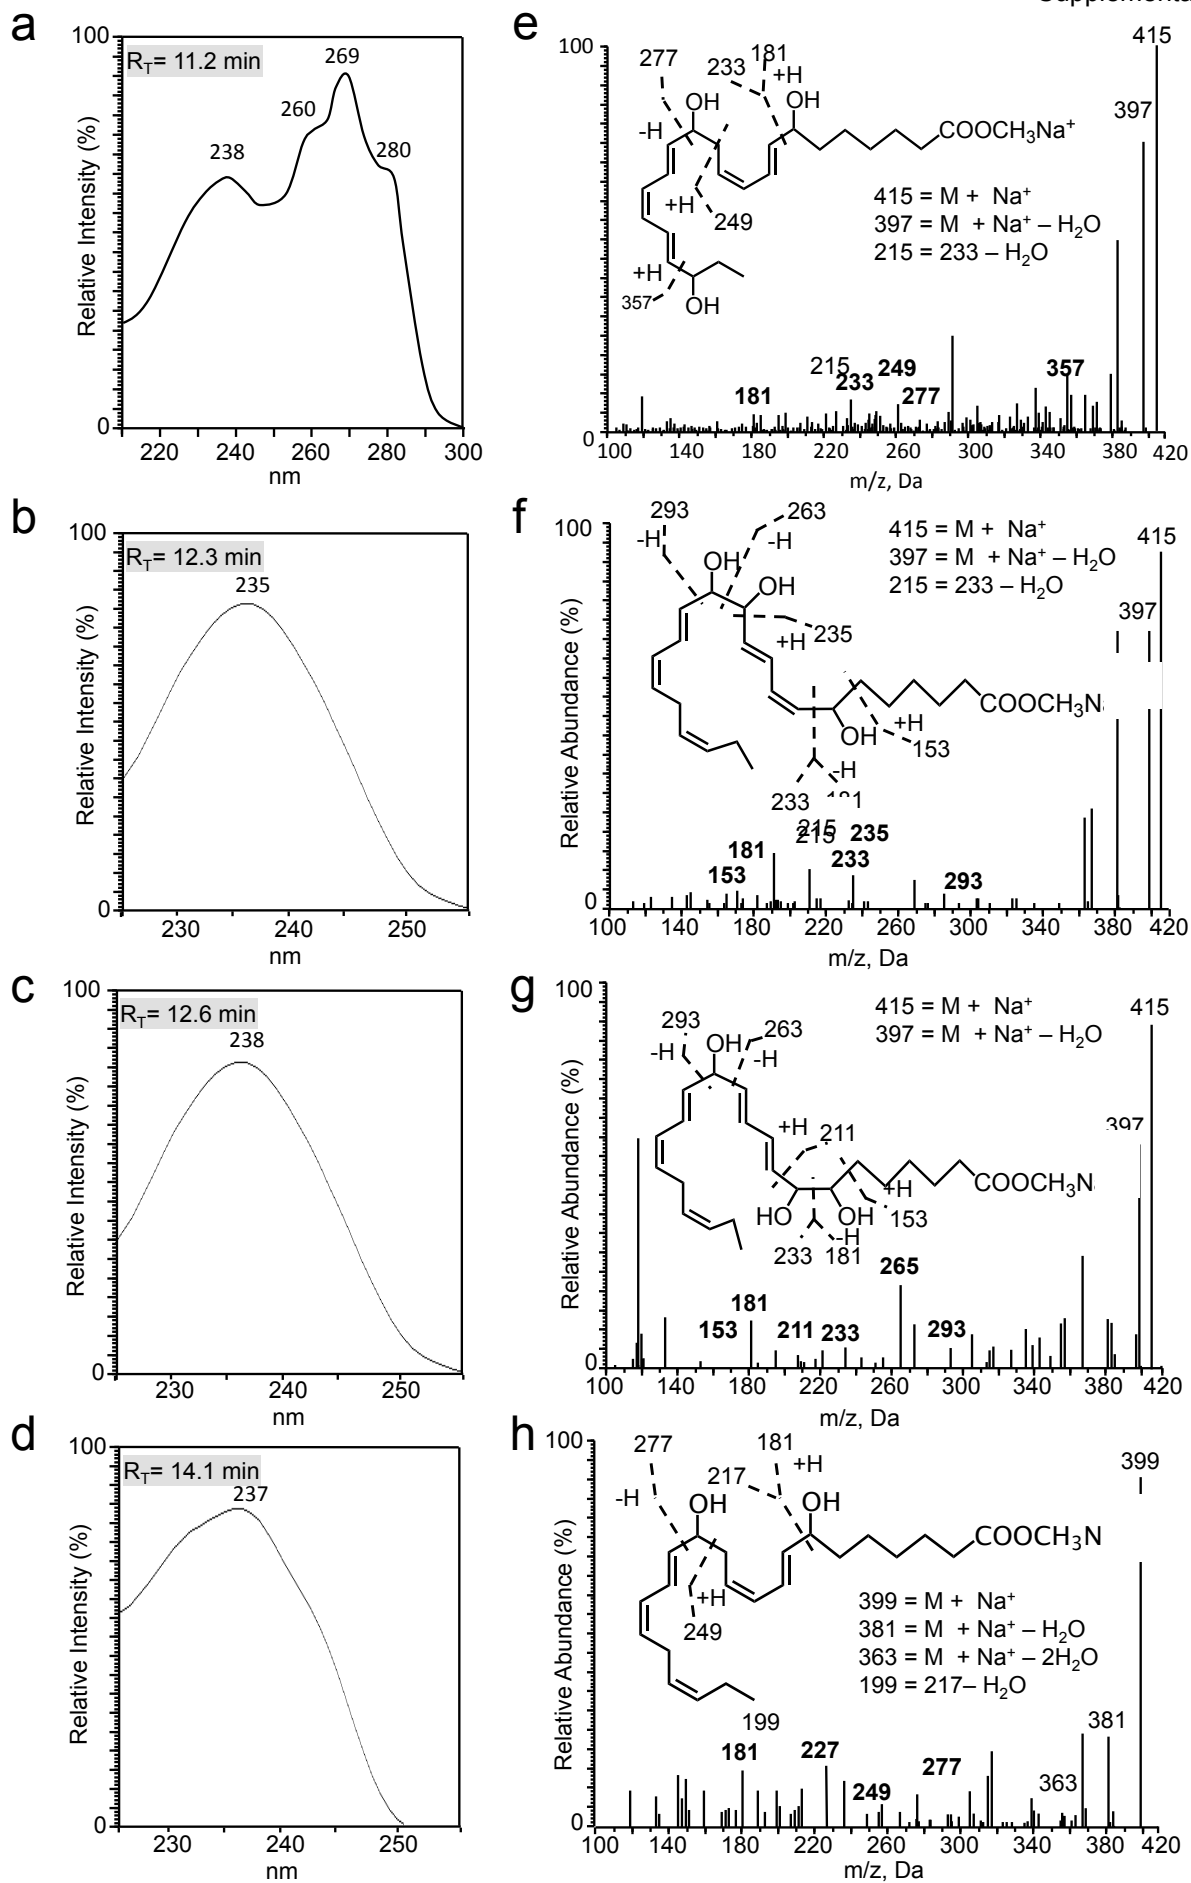

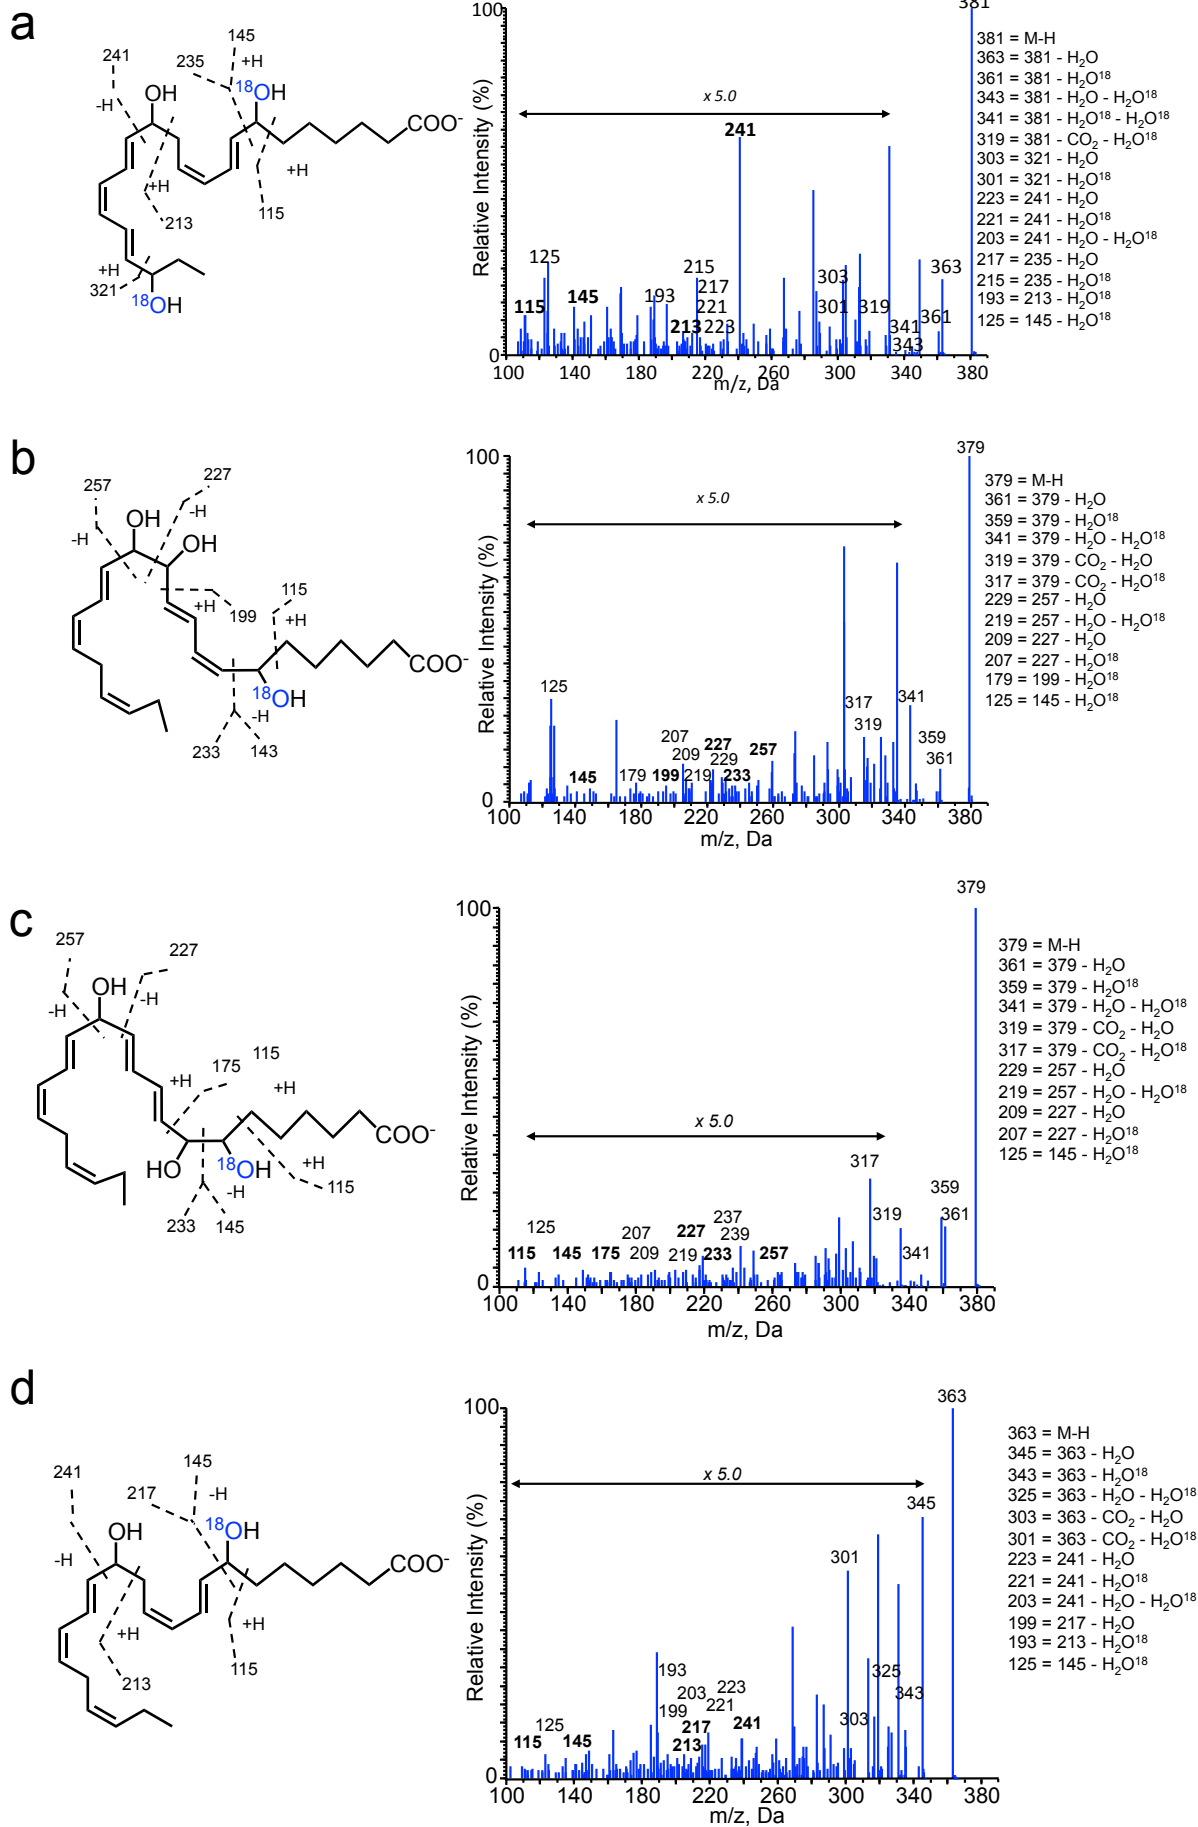

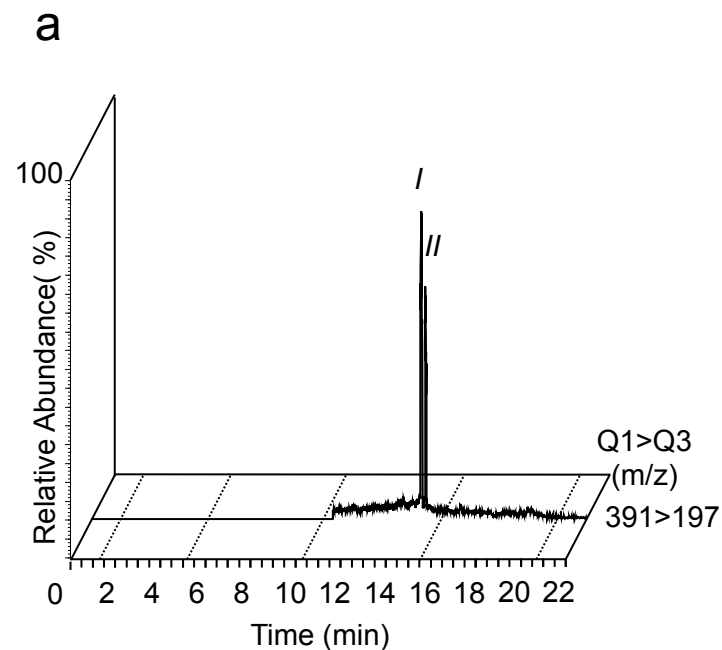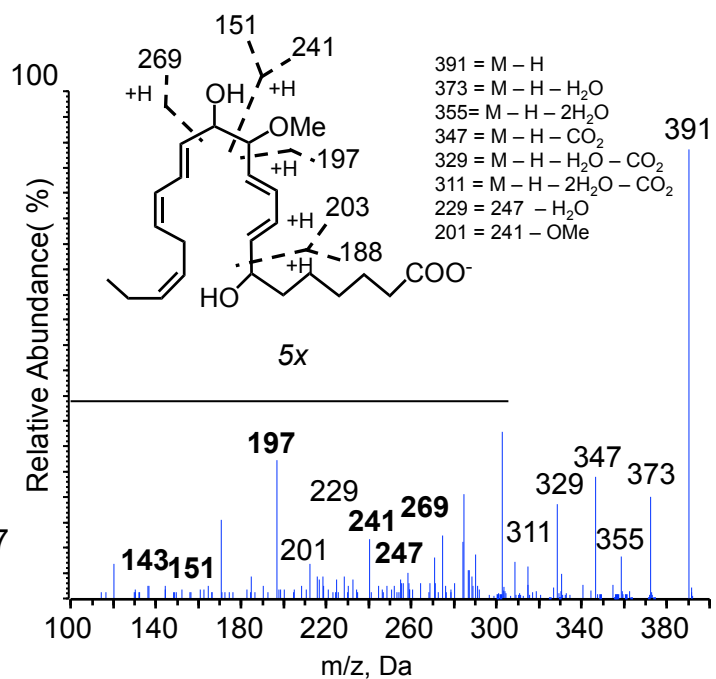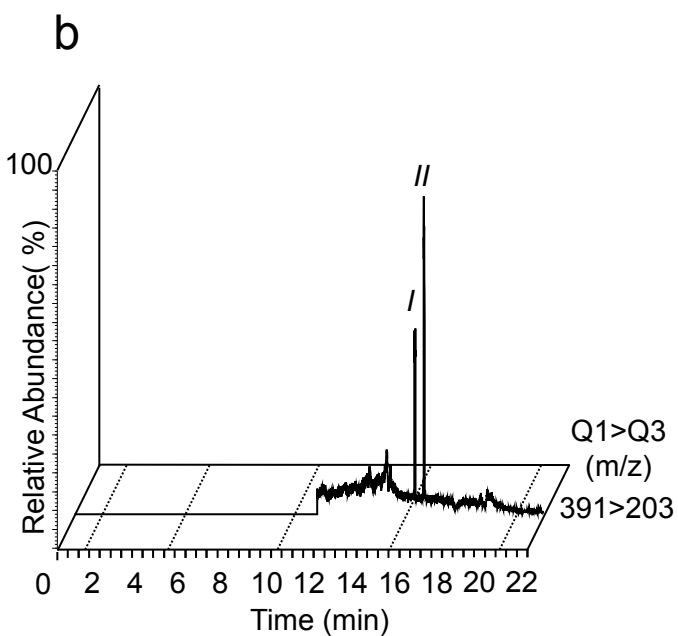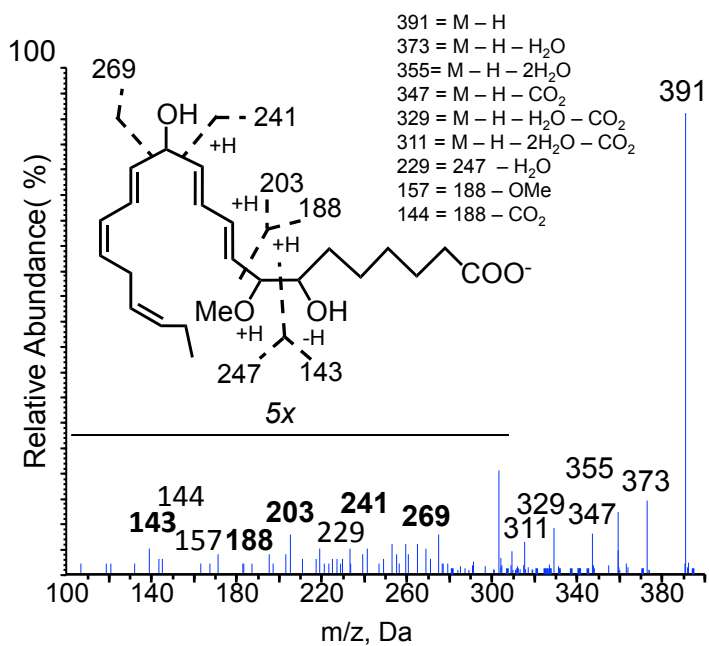

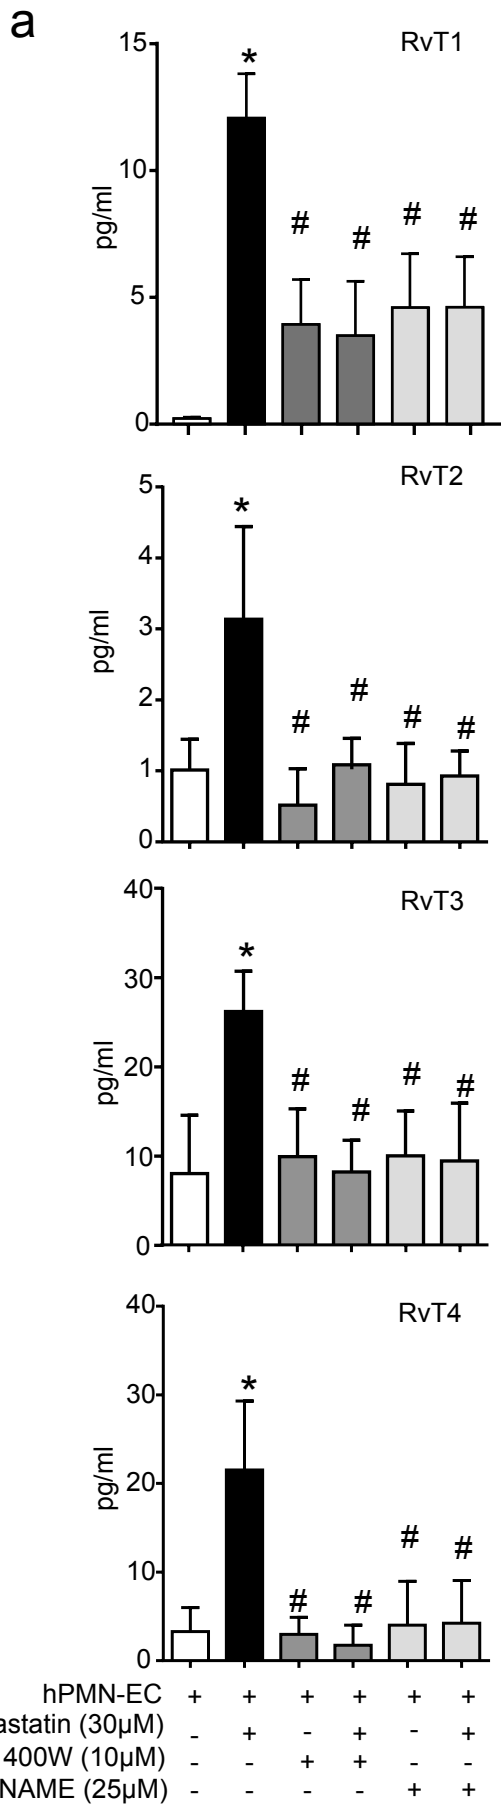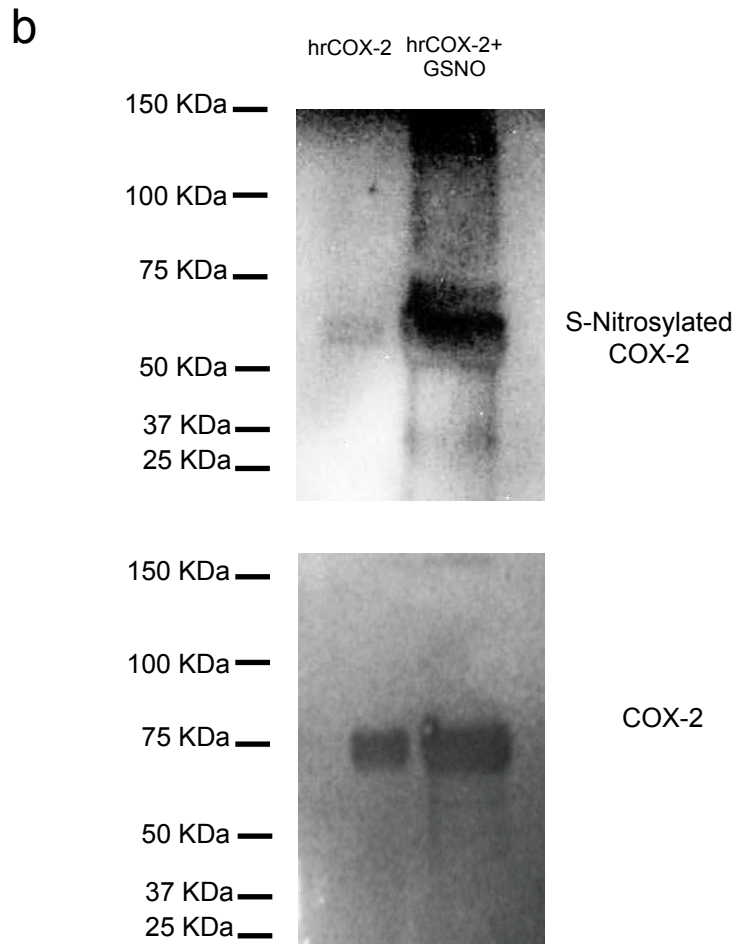

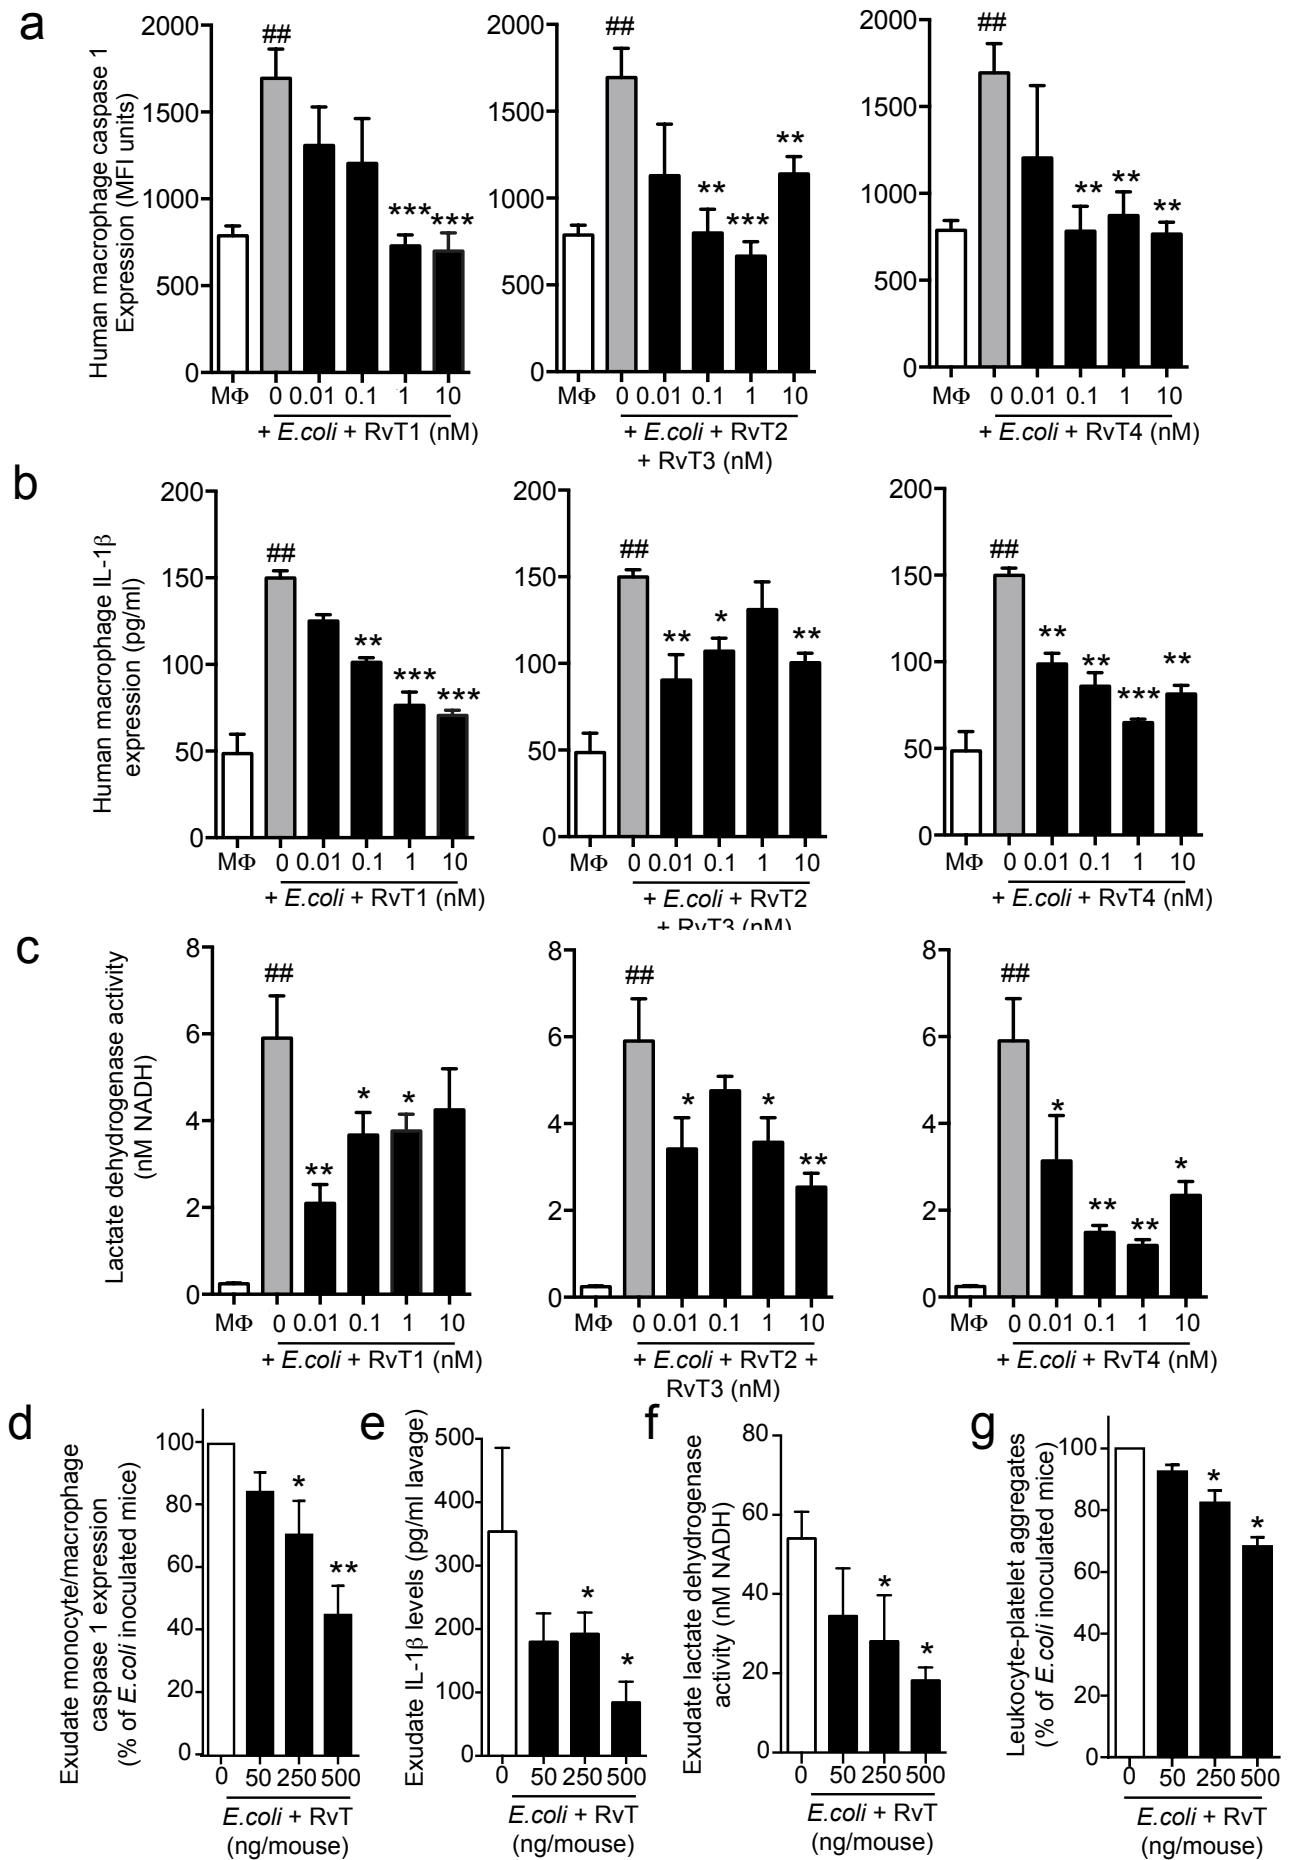

a

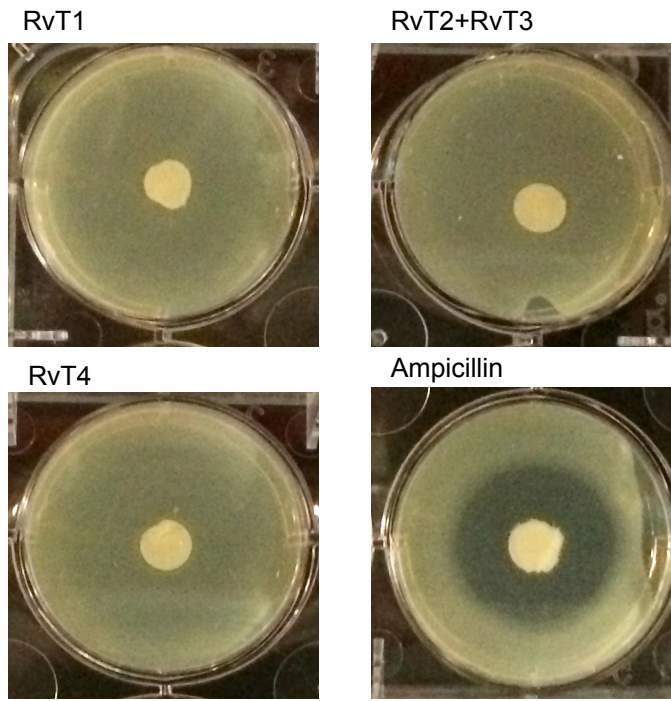

b

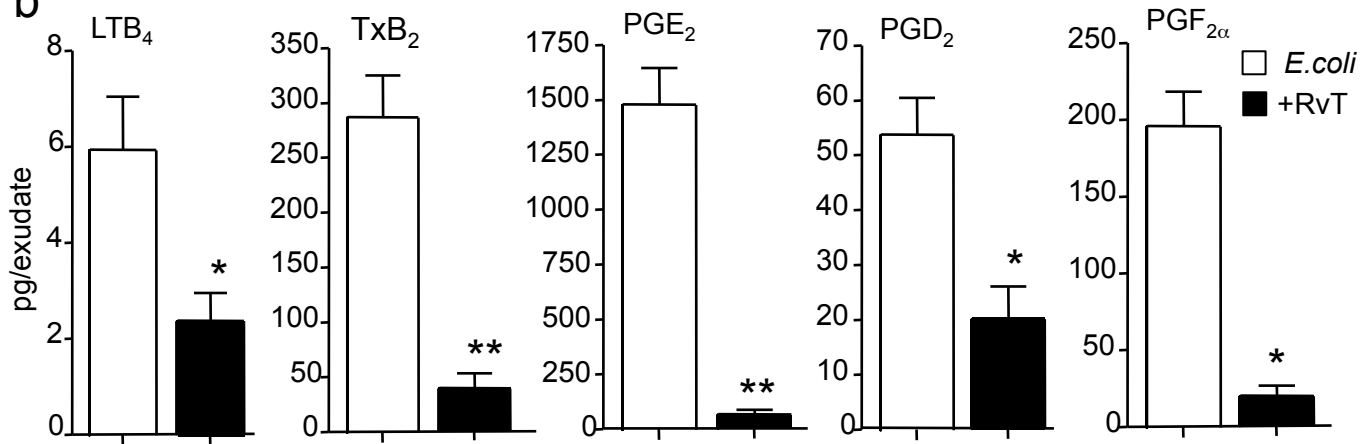



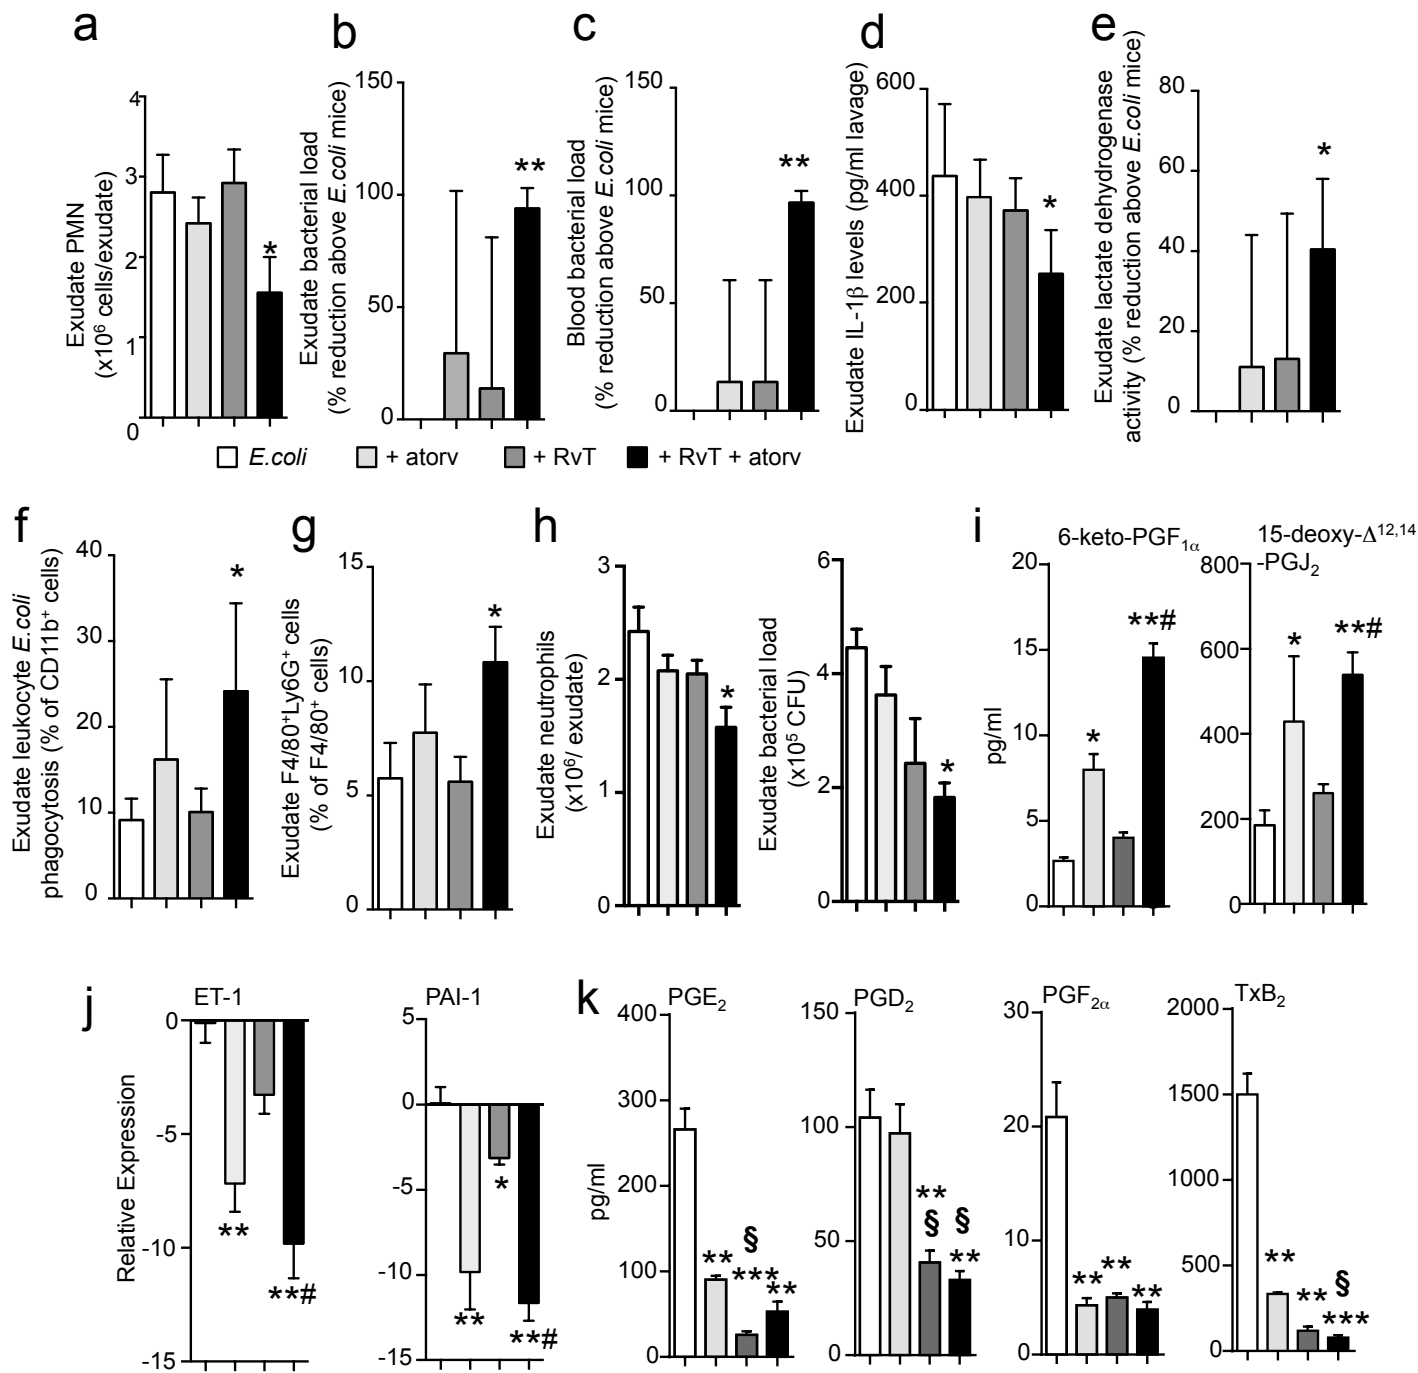

**Supplementary Table 1: Peripheral blood lipid mediator profiles pre and post-exercise in healthy volunteers**

a

| Sex   | Age<br>(years) | Weight<br>(Kg) | BMI<br>(Kg/m <sup>2</sup> ) |
|-------|----------------|----------------|-----------------------------|
| 2M/2F | 30-46          | 64.8±5.4       | 22.7±0.7                    |

b

| DHA Bioactive Metabolome            | Pre-Exercise<br>(pg/ml) | Post-Exercise<br>(pg/ml) |
|-------------------------------------|-------------------------|--------------------------|
| RvD1                                | 1.0 ± 0.3               | <b>4.6 ± 0.3</b>         |
| RvD2                                | 1.1 ± 0.3               | <b>1.5 ± 0.4</b>         |
| RvD3                                | 0.4 ± 0.2               | 0.5 ± 0.2                |
| RvD5                                | 0.7 ± 0.2               | 0.9 ± 0.7                |
| RvD6                                | 37.8 ± 12.3             | 56.0 ± 23.3              |
| MaR1                                | *                       | *                        |
| PD1                                 | 0.3 ± 0.1               | 0.5 ± 0.2                |
| <b>n-3 DPA Bioactive Metabolome</b> |                         |                          |
| RvT1                                | 1.8 ± 0.8               | <b>3.6 ± 0.4</b>         |
| RvT2                                | 0.6 ± 0.1               | <b>2.7 ± 0.8</b>         |
| RvT3                                | 0.8 ± 0.4               | <b>1.8 ± 0.5</b>         |
| RvT4                                | 0.8 ± 0.4               | <b>1.8 ± 0.5</b>         |
| <b>EPA Bioactive Metabolome</b>     |                         |                          |
| RvE1                                | 0.6 ± 0.2               | 1.5 ± 0.9                |
| RvE2                                | 39.1 ± 19.3             | 32.5 ± 23.4              |
| RvE3                                | 29.1 ± 11.1             | 69.3 ± 14.6              |
| <b>AA Bioactive Metabolome</b>      |                         |                          |
| LXA <sub>4</sub>                    | 3.6 ± 1.7               | 8.0 ± 5.3                |
| LXB <sub>4</sub>                    | 7.4 ± 4.0               | 19.3 ± 8.4               |
| 5,15-diHETE                         | 74.0 ± 22.6             | 89.1 ± 52.7              |
| LTB <sub>4</sub>                    | 4.5 ± 1.7               | 14.4 ± 7.0               |
| PGD <sub>2</sub>                    | 6.5 ± 2.7               | 31.2 ± 16.8              |
| PGE <sub>2</sub>                    | 115.2 ± 59.8            | 148.4 ± 78.5             |
| PGF <sub>2a</sub>                   | 4.4 ± 1.5               | 12.9 ± 10.3              |
| 8-iso-PGF <sub>2a</sub>             | 6.6 ± 5.4               | 3.9 ± 2.3                |
| TxB <sub>2</sub>                    | 4.8 ± 4.1               | <b>36.2 ± 9.9</b>        |
| 12-HHT                              | 109.0 ± 68.1            | 177.6 ± 55.1             |

(a) Healthy volunteer demographics (b) Peripheral blood was collected from healthy volunteers pre- and post-exercise (see methods) and lipid mediator levels quantified using MRM monitoring of the parent ion in Q1 and a characteristic fragment ion in Q3. Results are expressed as mean ± s.e.m. n=4 healthy volunteers from four independent experiments. \* = below limits; limits ~0.1pg. Numbers denoted in bold are p< 0.05 vs. pre-exercise values

**Supplementary Table 2: Comparison of SPM and Eicosanoids versus novel RvT in plasma from healthy volunteers and sepsis patients**

a

| Samples         | Sex     | Age (years) | Blood Culture                                                                                                                                                                                                                  |
|-----------------|---------|-------------|--------------------------------------------------------------------------------------------------------------------------------------------------------------------------------------------------------------------------------|
| Sepsis Patients | 5F/5M   | 57-96       | 1/10 <i>Salmonella</i> sp<br>1/10 <i>Streptococcus pyogenes</i><br>2/10 <i>Staphylococcus hominis</i><br>3/10 <i>Corynebacterium</i> sp.<br>1/10 <i>S. infantarius</i><br>1/10 <i>S. viridans</i><br>1/10 <i>S maltophilia</i> |
| Healthy         | 3F/3M   | 33-65       | N/A                                                                                                                                                                                                                            |
| SRM 1950        | 50M/50F | 40-50       | N/A                                                                                                                                                                                                                            |

b

| DHA Bioactive Metabolome            | Reference Plasma (pg/ml) | Healthy Volunteer Plasma (pg/ml) | Sepsis Patients Plasma (pg/ml) |
|-------------------------------------|--------------------------|----------------------------------|--------------------------------|
| RvD1                                | 0.8 ± 0.4                | 1.8 ± 1.4                        | <b>4.6 ± 2.4</b>               |
| RvD2                                | 0.9 ± 0.3                | 1.5 ± 1.0                        | <b>3.7 ± 1.3</b>               |
| RvD3                                | *                        | *                                | <b>10.5 ± 5.5</b>              |
| RvD5                                | 0.8 ± 0.3                | 0.9 ± 0.5                        | <b>17.0 ± 6.9</b>              |
| RvD6                                | 1.5 ± 0.2                | <b>27.6 ± 7.2</b>                | <b>121.8 ± 31.8</b>            |
| MaR1                                | *                        | *                                | <b>7.4 ± 3.4</b>               |
| PD1                                 | *                        | 1.2 ± 0.8                        | 1.5 ± 0.7                      |
| <b>n-3 DPA Bioactive Metabolome</b> |                          |                                  |                                |
| RvT1                                | 5.0 ± 1.7                | <b>2.9 ± 0.6</b>                 | <b>6.6 ± 1.1</b>               |
| RvT2                                | 2.2 ± 1.3                | 1.2 ± 0.3                        | <b>10.0 ± 1.8</b>              |
| RvT3                                | 1.0 ± 0.2                | 0.9 ± 0.4                        | <b>17.5 ± 3.2</b>              |
| RvT4                                | 7.3 ± 3.1                | <b>1.4 ± 0.6</b>                 | <b>15.2 ± 3.3</b>              |
| <b>EPA Bioactive Metabolome</b>     |                          |                                  |                                |
| RvE1                                | *                        | 2.2 ± 1.2                        | <b>11.0 ± 5.3</b>              |
| RvE2                                | *                        | <b>3.7 ± 0.9</b>                 | <b>24.7 ± 11.2</b>             |
| RvE3                                | 1.5 ± 0.5                | <b>8.9 ± 2.6</b>                 | <b>361.3 ± 241.5</b>           |
| <b>AA Bioactive Metabolome</b>      |                          |                                  |                                |
| LXA <sub>4</sub>                    | *                        | 0.8 ± 0.4                        | <b>5.5 ± 2.4</b>               |
| LXB <sub>4</sub>                    | 8.7 ± 2.7                | 3.2 ± 1.5                        | <b>56.7 ± 20.5</b>             |
| 5,15-diHETE                         | 4.2 ± 1.7                | 6.2 ± 1.1                        | 87.1 ± 55.7                    |
| LTB <sub>4</sub>                    | 25.2 ± 3.1               | 3.7 ± 2.2                        | 3.3 ± 1.2                      |
| PGD <sub>2</sub>                    | 7.3 ± 1.2                | 9.8 ± 4.4                        | <b>79.4 ± 24.1</b>             |
| PGE <sub>2</sub>                    | 17.8 ± 5.1               | 24.1 ± 9.7                       | <b>132.1 ± 22.2</b>            |
| PGF <sub>2a</sub>                   | 1.7 ± 0.7                | 4.2 ± 0.6                        | <b>51.0 ± 10.2</b>             |
| 8-iso-PGF <sub>2α</sub>             | 4.5 ± 1.0                | 1.9 ± 1.0                        | 11.8 ± 5.3                     |
| TxB <sub>2</sub>                    | 6.3 ± 3.2                | 10.5 ± 6.3                       | <b>185.4 ± 96.5</b>            |
| 12-HHT                              | 21.8 ± 1.0               | 39.6 ± 13.8                      | <b>127.7 ± 89.9</b>            |

(a) healthy volunteer demographics and patient demographics and cultures. (b) Plasma was obtained from the NIST repository (reference plasma; d=3), collected from healthy volunteers (n=4) or patients diagnosed with sepsis (n=9), and lipid mediator levels quantified using MRM monitoring of the parent ion in Q1 and a characteristic fragment ion in Q3. Results are expressed as mean±s.e.m. from two independent experiments. \* = below limits; limits ~0.1pg. Numbers denoted in bold are p< 0.05 vs reference plasma values.

**Supplementary Table 2: Peripheral blood lipid mediator profiles during self-resolving infections in mice**

| <b>DHA Bioactive Metabolome</b>     | <b>0h</b><br>(pg/ml) | <b>4h</b><br>(pg/ml)    | <b>12h</b><br>(pg/ml)  | <b>24h</b><br>(pg/ml) | <b>48h</b><br>(pg/ml) |
|-------------------------------------|----------------------|-------------------------|------------------------|-----------------------|-----------------------|
| RvD1                                | 5.5 ± 3.5            | 51.0 ± 22.8             | <b>27.6 ± 13.6</b>     | <b>12.8 ± 2.8</b>     | 15.5 ± 7.4            |
| RvD2                                | 8.1 ± 3.2            | 16.0 ± 6.1              | <b>22.7 ± 5.2</b>      | <b>4.0 ± 0.9</b>      | <b>2.2 ± 0.9</b>      |
| RvD3                                | 2.6 ± 1.0            | 6.3 ± 3.4               | <b>2.7 ± 0.6</b>       | <b>1.1 ± 0.3</b>      | <b>6.1 ± 4.6</b>      |
| RvD5                                | 22.7 ± 4.4           | 16.9 ± 2.5              | <b>25.1 ± 8.1</b>      | <b>8.7 ± 1.0</b>      | <b>9.2 ± 1.7</b>      |
| RvD6                                | 51.4 ± 18.4          | <b>346.8 ± 82.5</b>     | <b>435.8 ± 51.6</b>    | <b>259.3 ± 49.3</b>   | <b>219.4 ± 60.7</b>   |
| MaR1                                | *                    | *                       | *                      | *                     | *                     |
| PD1                                 | 1.8 ± 1.2            | 4.2 ± 1.8               | 4.1 ± 1.4              | 3.0 ± 0.8             | 3.9 ± 1.2             |
| <b>n-3 DPA Bioactive Metabolome</b> |                      |                         |                        |                       |                       |
| RvT1                                | 6.4 ± 2.1            | <b>34.6 ± 3.3</b>       | 12.6 ± 2.9             | 6.8 ± 2.6             | 10.3 ± 3.3            |
| RvT2                                | 9.4 ± 3.2            | <b>50.3 ± 10.0</b>      | 14.1 ± 2.3             | 5.2 ± 1.2             | <b>5.2 ± 0.8</b>      |
| RvT3                                | 11.5 ± 6.0           | <b>32.7 ± 4.6</b>       | 16.4 ± 1.3             | 3.3 ± 1.1             | <b>5.2 ± 1.1</b>      |
| RvT4                                | 10.2 ± 1.5           | <b>45.5 ± 3.5</b>       | 10.4 ± 1.7             | 5.1 ± 1.4             | <b>4.8 ± 0.5</b>      |
| <b>EPA Bioactive Metabolome</b>     |                      |                         |                        |                       |                       |
| RvE1                                | 0.6 ± 0.4            | 0.2 ± 0.3               | 2.2 ± 2.6              | 0.6 ± 0.2             | 2.7 ± 1.2             |
| RvE2                                | 14.0 ± 2.2           | 88.5 ± 26.3             | <b>139.0 ± 37.1</b>    | 85.0 ± 27.9           | 44.4 ± 17.9           |
| RvE3                                | 39.4 ± 4.5           | <b>229.4 ± 47.9</b>     | <b>356.3 ± 51.7</b>    | <b>155.7 ± 20.2</b>   | 104.9 ± 40.5          |
| <b>AA Bioactive Metabolome</b>      |                      |                         |                        |                       |                       |
| LXA <sub>4</sub>                    | 12.6 ± 4.1           | 39.9 ± 23.7             | <b>70.7 ± 26.8</b>     | 16.7 ± 5.3            | 46.0 ± 15.1           |
| LXB <sub>4</sub>                    | 41.1 ± 13.5          | 73.9 ± 22.4             | <b>143.9 ± 59.7</b>    | 37.2 ± 8.5            | 36.2 ± 7.0            |
| 5,15-diHETE                         | 95.0 ± 4.6           | 121.1 ± 19.7            | <b>51.6 ± 20.5</b>     | 36.4 ± 9.1            | <b>19.2 ± 4.3</b>     |
| LTB <sub>4</sub>                    | 0.7 ± 0.4            | <b>100.3 ± 18.2</b>     | <b>35.9 ± 6.7</b>      | 12.0 ± 2.8            | 106.9 ± 42.0          |
| PGD <sub>2</sub>                    | 7.7 ± 0.9            | <b>353.5 ± 11.5</b>     | <b>273.4 ± 50.0</b>    | 77.3 ± 20.6           | <b>106.3 ± 17.7</b>   |
| PGE <sub>2</sub>                    | 9.2 ± 1.4            | <b>1602.0 ± 517.9</b>   | <b>1775.6 ± 302.8</b>  | 323.0 ± 196.8         | <b>414.3 ± 117.2</b>  |
| PGF <sub>2α</sub>                   | 3.3 ± 0.1            | <b>153.0 ± 64.5</b>     | <b>57.5 ± 19.4</b>     | 12.2 ± 3.3            | <b>26.7 ± 6.5</b>     |
| 8-iso-PGF <sub>2α</sub>             | 8.1 ± 0.9            | <b>227.6 ± 45.6</b>     | <b>255.0 ± 96.6</b>    | 64.5 ± 16.8           | 71.6 ± 25.3           |
| TxB <sub>2</sub>                    | 24.9 ± 9.5           | <b>1773.7 ± 514.9</b>   | <b>471.4 ± 174.6</b>   | <b>214.3 ± 26.0</b>   | <b>176.5 ± 22.0</b>   |
| 12-HHT                              | 89.8 ± 24.2          | <b>12598.1 ± 4257.8</b> | <b>12879.5 ± 772.7</b> | <b>3208.8 ± 871.5</b> | <b>4237.5 ± 750.0</b> |

Mice were inoculated with *E.coli* (1x10<sup>5</sup> CFU/mouse), blood was collected at the indicated intervals and lipid mediator levels quantified using MRM monitoring of the parent ion in Q1 and a characteristic fragment ion in Q3. Results are expressed as mean ± s.e.m. n=4 mice per group from two independent experiments. \* = below limits; limits ~0.1pg. Numbers denoted in bold are p< 0.05 vs. 0h values.

**Supplementary Table 3: Mouse peripheral blood lipid mediator profiles during self-resolving and delayed-resolving infections**

| <b>DHA Bioactive Metabolome</b>     | <b>Self-Resolving Infections</b> | <b>Delayed-Resolving Infections</b> |
|-------------------------------------|----------------------------------|-------------------------------------|
| RvD1                                | 9.8 ± 1.1                        | <b>3.5 ± 1.3</b>                    |
| RvD2                                | 9.4 ± 2.6                        | 7.4 ± 1.5                           |
| RvD3                                | 5.7 ± 1.2                        | <b>1.3 ± 0.2</b>                    |
| RvD5                                | 63.6 ± 13.8                      | 113.2 ± 29.1                        |
| RvD6                                | 55.2 ± 3.7                       | <b>20.6 ± 10.4</b>                  |
|                                     |                                  |                                     |
| MaR1                                | 0.3 ± 0.1                        | 0.2 ± 0.2                           |
|                                     |                                  |                                     |
| PD1                                 | 4.2 ± 1.1                        | 6.9 ± 3.0                           |
|                                     |                                  |                                     |
| <b>n-3 DPA Bioactive Metabolome</b> |                                  |                                     |
| RvT1                                | 40.6 ± 9.4                       | <b>19.9 ± 3.6</b>                   |
| RvT2                                | 55.8 ± 9.1                       | <b>21.7 ± 2.9</b>                   |
| RvT3                                | 41.8 ± 3.5                       | <b>7.9 ± 1.8</b>                    |
| RvT4                                | 36.4 ± 2.0                       | <b>19.7 ± 3.9</b>                   |
|                                     |                                  |                                     |
| <b>EPA Bioactive Metabolome</b>     |                                  |                                     |
| RvE1                                | 21.5 ± 6.8                       | <b>13.0 ± 2.6</b>                   |
| RvE2                                | 5.2 ± 1.6                        | <b>2.8 ± 0.9</b>                    |
| RvE3                                | 39.0 ± 14.0                      | 32.6 ± 8.7                          |
|                                     |                                  |                                     |
| <b>AA Bioactive Metabolome</b>      |                                  |                                     |
| LXA <sub>4</sub>                    | 3.2 ± 1.1                        | 2.6 ± 1.6                           |
| LXB <sub>4</sub>                    | 50.7 ± 5.7                       | <b>25.1 ± 5.1</b>                   |
| 5,15-diHETE                         | 22.6 ± 6.4                       | 29.2 ± 13.2                         |
|                                     |                                  |                                     |
| LTB <sub>4</sub>                    | 0.5 ± 0.0                        | 2.3 ± 0.6                           |
|                                     |                                  |                                     |
| PGD <sub>2</sub>                    | 6.3 ± 2.3                        | <b>14.3 ± 1.7</b>                   |
| PGE <sub>2</sub>                    | 2.7 ± 0.8                        | <b>6.7 ± 2.8</b>                    |
| PGF <sub>2a</sub>                   | 2.1 ± 0.6                        | 1.5 ± 0.4                           |
| 8-iso-PGF <sub>2α</sub>             | 4.4 ± 2.2                        | <b>20.1 ± 1.5</b>                   |
| TxB <sub>2</sub>                    | 4.4 ± 2.2                        | <b>21.6 ± 2.6</b>                   |
| 12-HHT                              | 12.3 ± 2.0                       | <b>31.3 ± 3.8</b>                   |

Mice were inoculated with  $1 \times 10^5$  CFU/mouse *E.coli* (self-resolving) or  $1 \times 10^7$  CFU/mouse *E.coli* (delayed-resolving), blood was collected after 4h and lipid mediator levels quantified using MRM monitoring of the parent ion in Q1 and a characteristic fragment ion in Q3. Results are expressed as mean ± s.e.m. n=5 mice per group from two independent experiments. Numbers denoted in bold are  $p < 0.05$  vs. self-resolving values.

**Supplementary Table 4: Lipid mediator levels in human endothelial cell incubations and neutrophil-endothelial cell co-incubations.**

| <b>DHA Bioactive Metabolome</b>     | <b>Endothelial cells</b> | <b>Neutrophil-endothelial cells</b> | <b>Neutrophil-endothelial cells plus Atorvastatin</b> |
|-------------------------------------|--------------------------|-------------------------------------|-------------------------------------------------------|
| RvD1                                | 2.5 ± 1.7                | 1.8 ± 1.8                           | 0.3 ± 0.1                                             |
| RvD2                                | 6.4 ± 0.9                | 4.3 ± 0.9                           | 6.4 ± 1.9                                             |
| RvD3                                | 11.8 ± 2.8               | 7.5 ± 1.2                           | 8.9 ± 3.2                                             |
| RvD5                                | 11.3 ± 1.4               | 10.7 ± 1.7                          | <b>8.2 ± 1.4</b>                                      |
| RvD6                                | 84.5 ± 14.7              | 108.2 ± 29.7                        | <b>122.8 ± 16.0</b>                                   |
|                                     |                          |                                     |                                                       |
| MaR1                                | 7.1 ± 2.2                | 4.8 ± 1.6                           | 6.8 ± 2.0                                             |
|                                     |                          |                                     |                                                       |
| PD1                                 | 0.7 ± 0.5                | 0.2 ± 0.1                           | 0.2 ± 0.0                                             |
|                                     |                          |                                     |                                                       |
| <b>n-3 DPA Bioactive Metabolome</b> |                          |                                     |                                                       |
| RvT1                                | 1.7 ± 0.5                | <b>8.4 ± 1.0</b>                    | <b>13.4 ± 0.9</b>                                     |
| RvT2                                | 1.3 ± 0.8                | <b>3.2 ± 1.6</b>                    | <b>17.7 ± 3.0</b>                                     |
| RvT3                                | 2.5 ± 0.8                | <b>8.8 ± 1.8</b>                    | <b>15.9 ± 4.2</b>                                     |
| RvT4                                | 3.0 ± 0.3                | <b>11.3 ± 1.7</b>                   | <b>13.7 ± 1.3</b>                                     |
|                                     |                          |                                     |                                                       |
| <b>EPA Bioactive Metabolome</b>     |                          |                                     |                                                       |
| RvE1                                | 0.0 ± 0.0                | 0.5 ± 0.4                           | 2.0 ± 1.5                                             |
| RvE2                                | 42.0 ± 24.2              | 32.7 ± 8.6                          | <b>71.7 ± 20.8</b>                                    |
| RvE3                                | 18.1 ± 1.8               | 27.5 ± 9.1                          | <b>25.4 ± 6.3</b>                                     |
|                                     |                          |                                     |                                                       |
| <b>AA Bioactive Metabolome</b>      |                          |                                     |                                                       |
| LXA <sub>4</sub>                    | 33.1 ± 6.1               | 26.8 ± 5.8                          | 21.0 ± 2.8                                            |
| LXB <sub>4</sub>                    | 4.5 ± 2.6                | 13.5 ± 9.1                          | 10.1 ± 7.0                                            |
| 5,15-diHETE                         | 17.8 ± 3.5               | 20.8 ± 4.1                          | 21.2 ± 1.5                                            |
|                                     |                          |                                     |                                                       |
| LTB <sub>4</sub>                    | 0.4 ± 0.2                | <b>50.8 ± 9.9</b>                   | <b>63.8 ± 11.3</b>                                    |
|                                     |                          |                                     |                                                       |
| PGD <sub>2</sub>                    | 35.1 ± 8.2               | <b>132.1 ± 30.5</b>                 | <b>120.0 ± 40.4</b>                                   |
| PGE <sub>2</sub>                    | 46.7 ± 6.8               | <b>481.0 ± 114.6</b>                | <b>414.4 ± 193.5</b>                                  |
| PGF <sub>2a</sub>                   | 790.7 ± 152.0            | <b>1115.4 ± 76.6</b>                | <b>1064.2 ± 168.8</b>                                 |
| 8-iso-PGF <sub>2α</sub>             | 13.3 ± 4.0               | 22.0 ± 1.3                          | 21.9 ± 10.8                                           |
| TxB <sub>2</sub>                    | 367.5 ± 82.7             | <b>1680.8 ± 252.2</b>               | <b>1367.0 ± 420.1</b>                                 |
| 12-HHT                              | 102.0 ± 21               | <b>819.0 ± 318.9</b>                | <b>1005.3 ± 459.2</b>                                 |

Human endothelial cells were incubated with IL1 $\beta$  and TNF- $\alpha$  (10ng/ml each, 16h, 37°C), then vehicle (PBS containing 0.01% EtOH) or atorvastatin (Atorv; 30 min), for 30 min followed by n-3 DPA (1 $\mu$ M, 15min, 37°C) and human neutrophils (1x10<sup>7</sup> cells/ml, 60min, 37°C) or PBS. Products were profiled using LM metabololipidomics and quantified using MRM monitoring of the parent ion in Q1 and a characteristic fragment ion in Q3. Results are mean  $\pm$  s.e.m. n=4 independent cell preparations per group from four independent experiments. Numbers denoted in bold are p< 0.05 vs. endothelial cell incubations alone.

**Table S5: Evidence for the structure, biosynthesis, and actions of 13-series resolvins.**

|             | Biological system identified                                                                                                                                                                                                                    | For structural elucidation                                                                                                                                                                                                                                                                                                                                                                                                                                                                                                                  | Biosynthesis                                                                                                                                                                                                                                                                                                                                                                                                                                                                                                                                                                                                                                             | Bioactions                                                                                                                                                                                                                                                                                                                                                                                                                                                                                                                                                                                                                                                              |                                                                                                                                                                                                                                                                                                                                                                                                                                                    |
|-------------|-------------------------------------------------------------------------------------------------------------------------------------------------------------------------------------------------------------------------------------------------|---------------------------------------------------------------------------------------------------------------------------------------------------------------------------------------------------------------------------------------------------------------------------------------------------------------------------------------------------------------------------------------------------------------------------------------------------------------------------------------------------------------------------------------------|----------------------------------------------------------------------------------------------------------------------------------------------------------------------------------------------------------------------------------------------------------------------------------------------------------------------------------------------------------------------------------------------------------------------------------------------------------------------------------------------------------------------------------------------------------------------------------------------------------------------------------------------------------|-------------------------------------------------------------------------------------------------------------------------------------------------------------------------------------------------------------------------------------------------------------------------------------------------------------------------------------------------------------------------------------------------------------------------------------------------------------------------------------------------------------------------------------------------------------------------------------------------------------------------------------------------------------------------|----------------------------------------------------------------------------------------------------------------------------------------------------------------------------------------------------------------------------------------------------------------------------------------------------------------------------------------------------------------------------------------------------------------------------------------------------|
|             |                                                                                                                                                                                                                                                 |                                                                                                                                                                                                                                                                                                                                                                                                                                                                                                                                             |                                                                                                                                                                                                                                                                                                                                                                                                                                                                                                                                                                                                                                                          | In vivo                                                                                                                                                                                                                                                                                                                                                                                                                                                                                                                                                                                                                                                                 | In vitro                                                                                                                                                                                                                                                                                                                                                                                                                                           |
| <b>RvT1</b> | <ul style="list-style-type: none"> <li>Human healthy volunteer whole blood</li> <li>Human sepsis patient plasma</li> <li>Mouse plasma during <i>E. coli</i> infections</li> <li>Human neutrophil and endothelial cell co-incubations</li> </ul> | <ul style="list-style-type: none"> <li>Retention time in liquid chromatography 11.2 min</li> <li>UV chromophore <math>\lambda_{max}</math> # 269 and 238nm</li> <li>MS-MS spectrum of natural product m/z 377, 359, 341, 333, 319, 297, 239, 233, 215, 211, 193, 175, 143</li> <li>MS-MS spectrum of methyl ester sodium adduct m/z 415, 397, 357, 277, 249, 233, 181</li> <li>MS-MS spectrum of product containing O<sup>18</sup>: m/z 381, 363, 361, 343, 341, 319, 303, 301, 241, 223, 221, 217, 215, 213, 193, 145, 125, 115</li> </ul> | <ul style="list-style-type: none"> <li>Addition of n-3 docosapentaenoic acid to neutrophil-endothelial co-incubations increased compound 1 levels</li> <li>COX-2 specific inhibitor and shRNA to human COX-2 reduced 13R-hydroxy-7Z,10Z,14,16Z,19Z- docosapentaenoic acid levels</li> <li>COX-2 specific inhibitor reduced compound 1 levels in human neutrophil-endothelial cell co-incubations</li> <li>O<sup>18</sup> incorporation</li> </ul>                                                                                                                                                                                                        | <ul style="list-style-type: none"> <li>Protects against infection induced hypothermia*</li> <li>Limits neutrophil recruitment during infections*</li> <li>Stimulates murine leukocyte phagocytosis of <i>E. coli</i>*</li> <li>Stimulates macrophage efferocytosis of apoptotic neutrophils*</li> <li>Reduces exudate pro-inflammatory eicosanoid levels during infections*</li> <li>Reduces levels of inflammasome components*</li> <li>Reduces pyroptosis</li> <li>Elaborates the protective actions of atorvastatin in infections*</li> <li>Reduces circulating platelet-leukocyte aggregates*</li> <li>Downregulation of ET-1 and PAI-1 in lung tissue*</li> </ul>  | <ul style="list-style-type: none"> <li>Stimulates human macrophage efferocytosis of apoptotic neutrophils</li> <li>Stimulates human macrophage and neutrophil phagocytosis of <i>E. coli</i></li> <li>Stimulates human macrophage and neutrophil intra-phagolysosomal ROS production</li> <li>Reduces <i>E. coli</i> induced inflammasome components in human macrophages</li> <li>Reduces <i>E. coli</i> induced macrophage pyroptosis</li> </ul> |
| <b>RvT2</b> | <ul style="list-style-type: none"> <li>Human healthy volunteer whole blood</li> <li>Human sepsis patient plasma</li> <li>Mouse plasma during <i>E. coli</i> infections</li> <li>Human neutrophil and endothelial cell co-incubations</li> </ul> | <ul style="list-style-type: none"> <li>Retention time in liquid chromatography 12.3 min</li> <li>UV chromophore <math>\lambda_{max}</math> # 235 nm</li> <li>MS-MS spectrum m/z 377, 359, 341, 333, 315, 297, 233, 225, 207, 197, 181, 143</li> <li>MS-MS spectrum of methyl ester sodium adduct m/z 415, 397, 293, 235, 233, 181, 153</li> <li>MS-MS spectrum of product containing O<sup>18</sup>: m/z 379, 361, 359, 319, 317, 257, 233, 229, 227, 219, 209, 207, 199, 179, 145, 125</li> </ul>                                          | <ul style="list-style-type: none"> <li>Addition of n-3 docosapentaenoic acid to neutrophil-endothelial co-incubations increased compound 1 levels</li> <li>COX-2 specific inhibitor and shRNA to human COX-2 reduced 13R-hydroxy-7Z,10Z,14,16Z,19Z-docosapentaenoic acid levels</li> <li>COX-2 specific inhibitor reduced compound 1 levels in human neutrophil-endothelial cell co-incubations</li> <li>Incubation of 13R-hydroxy-7Z,10Z,14,16Z,19Z-docosapentaenoic acid with neutrophils and acid methanol gave trapping products that were consistent with the formation of an epoxide intermediate</li> <li>O<sup>18</sup> incorporation</li> </ul> | <ul style="list-style-type: none"> <li>Protects against infection induced hypothermia*</li> <li>Limits neutrophil recruitment during infections*</li> <li>Stimulates murine leukocyte phagocytosis of <i>E. coli</i>*</li> <li>Stimulates macrophage efferocytosis of apoptotic neutrophils*</li> <li>Reduces exudate pro-inflammatory eicosanoid levels during infections*</li> <li>Reduces levels of inflammasome components*</li> <li>Reduces pyroptosis</li> <li>Elaborates the protective actions of atorvastatin in infections*</li> <li>Downregulation of ET-1 and PAI-1 in lung tissue</li> <li>Reduces circulating platelet - leukocyte aggregates*</li> </ul> | <ul style="list-style-type: none"> <li>Stimulates human macrophage efferocytosis of apoptotic neutrophils</li> <li>Stimulates human macrophage and neutrophil phagocytosis of <i>E. coli</i></li> <li>Stimulates human macrophage and neutrophil intra-phagolysosomal ROS production</li> <li>Reduces <i>E. coli</i> induced inflammasome components in human macrophages</li> <li>Reduces <i>E. coli</i> induced macrophage pyroptosis</li> </ul> |



|             |                                                                                                                                                                                                                                                 |                                                                                                                                                                                                                                                                                                                                                                                                                                                                                                          |                                                                                                                                                                                                                                                                                                                                                                                                                                                                                                                                                                                                                                                            |                                                                                                                                                                                                                                                                                                                                                                                                                                                                                                                                                                                                                                                                        |                                                                                                                                                                                                                                                                                                                                                                                                                                                    |
|-------------|-------------------------------------------------------------------------------------------------------------------------------------------------------------------------------------------------------------------------------------------------|----------------------------------------------------------------------------------------------------------------------------------------------------------------------------------------------------------------------------------------------------------------------------------------------------------------------------------------------------------------------------------------------------------------------------------------------------------------------------------------------------------|------------------------------------------------------------------------------------------------------------------------------------------------------------------------------------------------------------------------------------------------------------------------------------------------------------------------------------------------------------------------------------------------------------------------------------------------------------------------------------------------------------------------------------------------------------------------------------------------------------------------------------------------------------|------------------------------------------------------------------------------------------------------------------------------------------------------------------------------------------------------------------------------------------------------------------------------------------------------------------------------------------------------------------------------------------------------------------------------------------------------------------------------------------------------------------------------------------------------------------------------------------------------------------------------------------------------------------------|----------------------------------------------------------------------------------------------------------------------------------------------------------------------------------------------------------------------------------------------------------------------------------------------------------------------------------------------------------------------------------------------------------------------------------------------------|
| <b>RvT3</b> | <ul style="list-style-type: none"> <li>Human healthy volunteer whole blood</li> <li>Human sepsis patient plasma</li> <li>Mouse plasma during <i>E. coli</i> infections</li> <li>Human neutrophil and endothelial cell co-incubations</li> </ul> | <ul style="list-style-type: none"> <li>Retention time in liquid chromatography 12.6 min</li> <li>UV chromophore <math>\lambda_{max}</math> # 238 nm</li> <li>MS-MS spectrum 377, 359, 341, 333, 315, 297, 255, 233, 207, 173, 155, 143</li> <li>MS-MS spectrum of methyl ester sodium adduct m/z 415, 397, 293, 265, 233, 211, 181</li> <li>MS-MS Spectrum of product containing O<sup>18</sup>: m/z 379, 361, 359, 341, 319, 317, 257, 239, 237, 233, 227, 219, 209, 207, 175, 145, 125, 115</li> </ul> | <ul style="list-style-type: none"> <li>Addition of n-3 docosapentaenoic acid to neutrophil-endothelial co-incubations increased compound 1 levels</li> <li>COX-2 specific inhibitor and shRNA to human COX-2 reduced 13R-hydroxy-7Z,10Z,14,16Z,19Z- docosapentaenoic acid levels</li> <li>COX-2 specific inhibitor reduced compound 1 levels in human neutrophil-endothelial cell co-incubations</li> <li>Incubation of 13R-hydroxy-7Z,10Z,14,16Z,19Z- docosapentaenoic acid with neutrophils and acid methanol gave trapping products that were consistent with the formation of an epoxide intermediate</li> <li>O<sup>18</sup> incorporation</li> </ul> | <ul style="list-style-type: none"> <li>Protects against infection induced hypothermia*</li> <li>Limits neutrophil recruitment during infections*</li> <li>Stimulates murine leukocyte phagocytosis of <i>E. coli</i>*</li> <li>Stimulates macrophage efferocytosis of apoptotic neutrophils*</li> <li>Reduces exudate pro-inflammatory eicosanoid levels during infections*</li> <li>Reduces levels of inflammasome components*</li> <li>Reduces pyroptosis</li> <li>Elaborates the protective actions of atorvastatin in infections*</li> <li>Reduces circulating platelet-leukocyte aggregates*</li> <li>Downregulation of ET-1 and PAI-1 in lung tissue*</li> </ul> | <ul style="list-style-type: none"> <li>Stimulates human macrophage efferocytosis of apoptotic neutrophils</li> <li>Stimulates human macrophage and neutrophil phagocytosis of <i>E. coli</i></li> <li>Stimulates human macrophage and neutrophil intra-phagolysosomal ROS production</li> <li>Reduces <i>E. coli</i> induced inflammasome components in human macrophages</li> <li>Reduces <i>E. coli</i> induced macrophage pyroptosis</li> </ul> |
| <b>RvT4</b> | <ul style="list-style-type: none"> <li>Human healthy volunteer whole blood</li> <li>Human sepsis patient plasma</li> <li>Mouse plasma during <i>E. coli</i> infections</li> <li>Human neutrophil and endothelial cell co-incubations</li> </ul> | <ul style="list-style-type: none"> <li>Retention time in liquid chromatography 14.1 min</li> <li>UV chromophore <math>\lambda_{max}</math> # 237 nm</li> <li>MS-MS spectrum m/z 361, 343, 325, 299, 221, 239, 217, 211, 199, 193, 143</li> <li>MS-MS spectrum of methyl ester sodium adduct m/z 399, 381, 363, 249, 227, 199, 181</li> <li>MS-MS spectrum of product containing O<sup>18</sup>: m/z 363, 345, 343, 325, 303, 301 241, 233, 221, 217, 213, 203, 199, 193, 145, 125, 115</li> </ul>        | <ul style="list-style-type: none"> <li>Addition of n-3 docosapentaenoic acid to neutrophil-endothelial co-incubations increased compound 1 levels</li> <li>COX-2 specific inhibitor and shRNA to human COX-2 reduced 13R-hydroxy-7Z,10Z,14,16Z,19Z- docosapentaenoic acid levels</li> <li>COX-2 specific inhibitor reduced compound 1 levels in human neutrophil-endothelial cell co-incubations</li> <li>O<sup>18</sup> incorporation</li> </ul>                                                                                                                                                                                                          | <ul style="list-style-type: none"> <li>Protects against infection induced hypothermia*</li> <li>Limits neutrophil recruitment during infections*</li> <li>Stimulates murine leukocyte phagocytosis of <i>E. coli</i>*</li> <li>Stimulates macrophage efferocytosis of apoptotic neutrophils*</li> <li>Reduces exudate pro-inflammatory eicosanoid levels during infections*</li> <li>Reduces levels of inflammasome components*</li> <li>Reduces pyroptosis</li> <li>Elaborates the protective actions of atorvastatin in infections*</li> <li>Reduces circulating platelet-leukocyte aggregates*</li> <li>Downregulation of ET-1 and PAI-1 in lung tissue*</li> </ul> | <ul style="list-style-type: none"> <li>Stimulates human macrophage efferocytosis of apoptotic neutrophils</li> <li>Stimulates human macrophage and neutrophil phagocytosis of <i>E. coli</i></li> <li>Stimulates human macrophage and neutrophil intra-phagolysosomal ROS production</li> <li>Reduces <i>E. coli</i> induced inflammasome components in human macrophages</li> <li>Reduces <i>E. coli</i> induced macrophage pyroptosis</li> </ul> |

n = 3 or greater for experiments for structure elucidation. n = 3–4 for human neutrophil and macrophage assays and n= 4-17 for in vivo experiments. \*These bioactions were determined following co-administration of RvT1, RvT2, RvT3 and RvT4.

#Spectra were recorded online in methanol/water using an Agilent Technologies 1100 series diode array detector.
